# Supplementary material for: Lemneolemnanes A–D, Four Uncommon Sesquiterpenoids from the Soft Coral Lemnalia sp
Source: MDPI journal article supplement (doi:10.3390/md22040145), 2024-03-26
Supplement: s1 [file s1]

## Supporting Information

### Lemneolemnanes A–D, Four Uncommon Sesquiterpenoids from the Soft Coral *Lemnalia* sp.

Yuan Zong 1,2, Tian-Yun Jin 3, Jun-Jie Yang 1,2, Kun-Ya Wang 4, Xing Shi 1,2, Yue Zhang 1,2 and Ping-Lin Li 1,2,\*

1 Key Laboratory of Marine Drugs, Chinese Ministry of Education, School of Medicine and Pharmacy, Ocean University of China, Qingdao 266003, China; zongyuan@stu.ouc.edu.cn (Y.Z.);

yangjunjie@stu.ouc.edu.cn (J.-J.Y.); sx79494@163.com (X.S.); zhangyue\_00803@163.com (Y.Z.)

2 Laboratory of Marine Drugs and Biological Products, National Laboratory for Marine Science and Technology,

Qingdao 266235, China

3 Center for Marine Biotechnology and Biomedicine, Scripps Institution of Oceanography, University of California, San Diego La Jolla, CA 92093-0204, USA; t2jin@ucsd.edu

4 State Key Laboratory of Bioactive Substance and Function of Natural Medicines, Institute of Materia Medica, Chinese Academy of Medical Sciences & Peking Union Medical College, Beijing 100050, China; phoebewky@163.com

\* Correspondence: lipinglin@ouc.edu.cn; Tel.: +86-532-8203-3054

## Table

|                                                                                                                              |    |
|------------------------------------------------------------------------------------------------------------------------------|----|
| 1. 1D and 2D NMR Data for <b>1–2</b> . .....                                                                                 | 4  |
| <b>Table S1.</b> 1D and 2D NMR Data for Lemneolemnane A ( <b>1</b> ) in CDCl <sub>3</sub> . .....                            | 4  |
| <b>Table S2.</b> 1D and 2D NMR Data for Lemneolemnane B ( <b>2</b> ) in CDCl <sub>3</sub> . .....                            | 5  |
| <b>Table S3.</b> <sup>1</sup> H NMR and <sup>13</sup> C NMR data for <b>5–7</b> in CDCl <sub>3</sub> . .....                 | 6  |
| 2. X-ray crystallographic analyses of <b>1–4</b> . .....                                                                     | 7  |
| <b>Table S4.</b> X-ray diffraction analysis of Lemneolemnane A ( <b>1</b> ). .....                                           | 8  |
| <b>Table S5.</b> X-ray diffraction analysis of Lemneolemnane B ( <b>2</b> ). .....                                           | 9  |
| <b>Table S6.</b> X-ray diffraction analysis of Lemneolemnane C ( <b>3</b> ). .....                                           | 10 |
| <b>Table S7.</b> X-ray diffraction analysis of Lemneolemnane D ( <b>4</b> ). .....                                           | 11 |
| <b>Figure S1.</b> ORTEP diagrams of <b>1</b> (displacement ellipsoids are drawn at the 50% probability level). .....         | 12 |
| <b>Figure S2.</b> ORTEP diagrams of <b>2</b> (displacement ellipsoids are drawn at the 50% probability level). .....         | 13 |
| <b>Figure S3.</b> ORTEP diagrams of <b>3</b> (displacement ellipsoids are drawn at the 50% probability level). .....         | 14 |
| <b>Figure S4.</b> ORTEP diagrams of <b>4</b> (displacement ellipsoids are drawn at the 50% probability level). .....         | 15 |
| 3. Anti-Alzheimer's disease activity. ....                                                                                   | 16 |
| <b>Table S8.</b> Data related to anti-Alzheimer's disease activity testing .....                                             | 16 |
| 4. The 1D and 2D NMR spectra of <b>1–4</b> . .....                                                                           | 17 |
| <b>Figure S5.</b> HRESIMS spectrum of compound <b>1</b> . .....                                                              | 17 |
| <b>Figure S6.</b> UV spectrum of compound <b>1</b> . .....                                                                   | 17 |
| <b>Figure S7.</b> <sup>1</sup> H NMR spectrum of compound <b>1</b> in CDCl <sub>3</sub> , 500MHz. ....                       | 18 |
| <b>Figure S8.</b> <sup>13</sup> C NMR spectrum of compound <b>1</b> in CDCl <sub>3</sub> , 125MHz. ....                      | 18 |
| <b>Figure S9.</b> HSQC spectrum of compound <b>1</b> in CDCl <sub>3</sub> , 500MHz. ....                                     | 19 |
| <b>Figure S10.</b> HMBC NMR spectrum of compound <b>1</b> in CDCl <sub>3</sub> , 500MHz. ....                                | 19 |
| <b>Figure S11.</b> <sup>1</sup> H- <sup>1</sup> H COSY NMR spectrum of compound <b>1</b> in CDCl <sub>3</sub> , 500MHz. .... | 20 |
| <b>Figure S12.</b> NOESY NMR spectrum of compound <b>1</b> in CDCl <sub>3</sub> , 500MHz. ....                               | 20 |
| <b>Figure S13.</b> HRESIMS spectrum of compound <b>2</b> . .....                                                             | 21 |
| <b>Figure S14.</b> UV spectrum of compound <b>2</b> . .....                                                                  | 21 |
| <b>Figure S15.</b> <sup>1</sup> H NMR spectrum of compound <b>2</b> in CDCl <sub>3</sub> , 500MHz. ....                      | 22 |
| <b>Figure S16.</b> <sup>13</sup> C NMR spectrum of compound <b>2</b> in CDCl <sub>3</sub> , 125MHz. ....                     | 22 |
| <b>Figure S17.</b> HSQC spectrum of compound <b>2</b> in CDCl <sub>3</sub> , 500MHz. ....                                    | 23 |
| <b>Figure S18.</b> HMBC NMR spectrum of compound <b>2</b> in CDCl <sub>3</sub> , 500MHz. ....                                | 23 |
| <b>Figure S19.</b> <sup>1</sup> H- <sup>1</sup> H COSY NMR spectrum of compound <b>2</b> in CDCl <sub>3</sub> , 500MHz. .... | 24 |
| <b>Figure S20.</b> NOESY NMR spectrum of compound <b>2</b> in CDCl <sub>3</sub> , 500MHz. ....                               | 24 |

|                                                                                                                    |    |
|--------------------------------------------------------------------------------------------------------------------|----|
| <b>Figure S21.</b> HRESIMS spectrum of compound <b>3</b> .                                                         | 25 |
| <b>Figure S22.</b> UV spectrum of compound <b>3</b> .                                                              | 25 |
| <b>Figure S23.</b> $^1\text{H}$ NMR spectrum of compound <b>3</b> in $\text{CDCl}_3$ , 500MHz.                     | 26 |
| <b>Figure S24.</b> $^{13}\text{C}$ NMR spectrum of compound <b>3</b> in $\text{CDCl}_3$ , 125MHz.                  | 26 |
| <b>Figure S25.</b> HSQC spectrum of compound <b>3</b> in $\text{CDCl}_3$ , 500MHz.                                 | 27 |
| <b>Figure S26.</b> HMBC NMR spectrum of compound <b>3</b> in $\text{CDCl}_3$ , 500MHz.                             | 27 |
| <b>Figure S27.</b> $^1\text{H}$ - $^1\text{H}$ COSY NMR spectrum of compound <b>3</b> in $\text{CDCl}_3$ , 500MHz. | 28 |
| <b>Figure S28.</b> NOESY NMR spectrum of compound <b>3</b> in $\text{CDCl}_3$ , 500MHz.                            | 28 |
| <b>Figure S29.</b> HRESIMS spectrum of compound <b>4</b> .                                                         | 29 |
| <b>Figure S30.</b> UV spectrum of compound <b>4</b> .                                                              | 29 |
| <b>Figure S31.</b> $^1\text{H}$ NMR spectrum of compound <b>4</b> in $\text{CDCl}_3$ , 500MHz.                     | 30 |
| <b>Figure S32.</b> $^{13}\text{C}$ NMR spectrum of compound <b>4</b> in $\text{CDCl}_3$ , 125MHz.                  | 30 |
| <b>Figure S33.</b> HSQC spectrum of compound <b>4</b> in $\text{CDCl}_3$ , 500MHz.                                 | 31 |
| <b>Figure S34.</b> HMBC NMR spectrum of compound <b>4</b> in $\text{CDCl}_3$ , 500MHz.                             | 31 |
| <b>Figure S35.</b> $^1\text{H}$ - $^1\text{H}$ COSY NMR spectrum of compound <b>4</b> in $\text{CDCl}_3$ , 500MHz. | 32 |
| <b>Figure S36.</b> NOESY NMR spectrum of compound <b>4</b> in $\text{CDCl}_3$ , 500MHz.                            | 32 |
| <b>Figure S37.</b> $^1\text{H}$ NMR spectrum of compound <b>5</b> in $\text{CDCl}_3$ , 500MHz.                     | 33 |
| <b>Figure S38.</b> $^{13}\text{C}$ NMR spectrum of compound <b>5</b> in $\text{CDCl}_3$ , 125MHz.                  | 33 |
| <b>Figure S39.</b> $^1\text{H}$ NMR spectrum of compound <b>6</b> in $\text{CDCl}_3$ , 500MHz.                     | 34 |
| <b>Figure S40.</b> $^{13}\text{C}$ NMR spectrum of compound <b>6</b> in $\text{CDCl}_3$ , 125MHz.                  | 34 |
| <b>Figure S41.</b> $^1\text{H}$ NMR spectrum of compound <b>7</b> in $\text{CDCl}_3$ , 400MHz.                     | 35 |
| <b>Figure S42.</b> $^{13}\text{C}$ NMR spectrum of compound <b>7</b> in $\text{CDCl}_3$ , 100MHz.                  | 35 |

## 1. 1D and 2D NMR Data for 1–2.

**Table S1.** 1D and 2D NMR Data for Lemneolemnane A (**1**) in CDCl<sub>3</sub>.

| NO. | <b>1</b>                            |                                          |                                        |                                      |                                                            |
|-----|-------------------------------------|------------------------------------------|----------------------------------------|--------------------------------------|------------------------------------------------------------|
|     | $\delta_{\text{C}}^{\text{a}}$ type | $\delta_{\text{H}}^{\text{b}}$ (J in Hz) | $^1\text{H}$ – $^1\text{H}$ COSY       | HMBC                                 | NOESY                                                      |
| 1   | 41.1, C                             |                                          |                                        |                                      |                                                            |
| 2a  | 43.6, CH <sub>2</sub>               | 1.87 d (15.8)                            |                                        | C-1, C-3, C-4, C-8, C-12, C-13, C-14 | H <sub>3</sub> -13, H <sub>3</sub> -14, H <sub>3</sub> -15 |
| 2b  |                                     | 1.42 d (15.8)                            |                                        |                                      |                                                            |
| 3   | 76.8, C                             |                                          |                                        |                                      |                                                            |
| 4   | 73.8, CH                            | 6.51 d (5.7)                             | H-5                                    | C-3, C-5, C-6, C-14, C-17            |                                                            |
| 5   | 149.7, CH                           | 6.21 dt (5.6; 1.9)                       | H-4                                    | C-4, C-6, C-7, C-16                  | H-16                                                       |
| 6   | 142.8, C                            |                                          |                                        |                                      |                                                            |
| 7a  | 32.2, CH <sub>2</sub>               | 3.07 d (18.9)                            |                                        | C-1, C-5, C-6, C-8, C-9, C-16        |                                                            |
| 7b  |                                     | 2.93 d (18.9)                            |                                        |                                      |                                                            |
| 8   | 139.4, C                            |                                          |                                        |                                      |                                                            |
| 9   | 129.0, CH                           | 5.59 dd (5.7; 2.2)                       | H <sub>2</sub> -10                     | C-1, C-7, C-10, C-11                 |                                                            |
| 10a | 26.3, CH <sub>2</sub>               | 2.14 m                                   | H-9, H <sub>2</sub> -11                | C-8, C-9, C-11                       |                                                            |
| 10b |                                     | 2.04 m                                   |                                        |                                      |                                                            |
| 11a | 27.3, CH <sub>2</sub>               | 1.49 m                                   | H <sub>2</sub> -10, H-12               | C-1, C-9, C-10, C-12, C-15           |                                                            |
| 11b |                                     | 1.49 m                                   |                                        |                                      |                                                            |
| 12  | 34.4, CH                            | 2.47 m                                   | H <sub>2</sub> -11, H <sub>3</sub> -15 | C-1, C-10, C-11, C-13, C-15          |                                                            |
| 13  | 22.8, CH <sub>3</sub>               | 0.87 s                                   |                                        | C-1, C-2, C-8, C-12                  | H-2a, H <sub>3</sub> -15                                   |
| 14  | 26.2, CH <sub>3</sub>               | 1.14 s                                   |                                        | C-2, C-3, C-4                        | H-2a                                                       |
| 15  | 16.6, CH <sub>3</sub>               | 0.98 d (6.7)                             | H-12                                   | C-1, C-11, C-12                      | H-2a, H <sub>3</sub> -13                                   |
| 16  | 194.0, CH                           | 9.35 s                                   |                                        | C-5, C-6, C-7                        | H-5                                                        |
| 17  | 170.8, C                            |                                          |                                        |                                      |                                                            |
| 18  | 21.2, CH <sub>3</sub>               | 2.15 s                                   |                                        | C-17                                 |                                                            |

<sup>a</sup> Recorded at 125 MHz. <sup>b</sup> Recorded at 500 MHz.

**Table S2.** 1D and 2D NMR Data for Lemneolemnane B (**2**) in CDCl<sub>3</sub>.

| NO. | <b>2</b>              |                        |                                        |                                      |                                        |
|-----|-----------------------|------------------------|----------------------------------------|--------------------------------------|----------------------------------------|
|     | $\delta_c^a$ type     | $\delta_H^b$ (J in Hz) | $^1H$ - $^1H$ COSY                     | HMBC                                 | NOESY                                  |
| 1   | 40.7, C               |                        |                                        |                                      |                                        |
| 2a  | 46.2, CH <sub>2</sub> | 1.87 d (15.1)          |                                        | C-1, C-3, C-4, C-8, C-12, C-13, C-14 | H <sub>3</sub> -13, H <sub>3</sub> -15 |
| 2b  |                       | 1.61 d (15.1)          |                                        |                                      |                                        |
| 3   | 77.0, C               |                        |                                        |                                      |                                        |
| 4   | 73.7, CH              | 6.34 d (5.6)           | H-5                                    | C-5, C-6, C-17                       | H <sub>3</sub> -14                     |
| 5   | 150.2, CH             | 6.30 dt (5.6; 1.9)     | H-4                                    | C-4, C-6, C-7, C-16                  | H-16                                   |
| 6   | 142.6, C              |                        |                                        |                                      |                                        |
| 7a  | 32.6, CH <sub>2</sub> | 3.03 m                 |                                        | C-1, C-5, C-6, C-8, C-9, C-16        |                                        |
| 7b  |                       | 3.03 m                 |                                        |                                      |                                        |
| 8   | 139.1, C              |                        |                                        |                                      |                                        |
| 9   | 129.4, CH             | 5.62 d (3.7)           | H <sub>2</sub> -10                     | C-1, C-7, C-10, C-11                 |                                        |
| 10a | 26.0, CH <sub>2</sub> | 2.13 m                 | H-9, H <sub>2</sub> -11                | C-8, C-9, C-11                       |                                        |
| 10b |                       | 2.03 m                 |                                        |                                      |                                        |
| 11a | 27.3, CH <sub>2</sub> | 1.52 m                 | H <sub>2</sub> -10, H-12               | C-1, C-9, C-10, C-12, C-15           | H <sub>3</sub> -13, H <sub>3</sub> -15 |
| 11b |                       | 1.52 m                 |                                        |                                      |                                        |
| 12  | 34.2, CH              | 2.00 m                 | H <sub>2</sub> -11, H <sub>3</sub> -15 | C-1, C-10, C-11, C-13, C-15          | H <sub>3</sub> -14                     |
| 13  | 22.9, CH <sub>3</sub> | 0.92 s                 |                                        | C-1, C-2, C-8, C-12                  | H-2a, H-11                             |
| 14  | 27.2, CH <sub>3</sub> | 1.44 s                 |                                        | C-2, C-3, C-4                        | H-12, H-4                              |
| 15  | 16.5, CH <sub>3</sub> | 0.96 d (6.7)           | H-12                                   | C-1, C-11, C-12                      | H-2a, H-11                             |
| 16  | 194.1, C              | 9.38 s                 |                                        | C-5, C-6, C-7                        | H-5                                    |
| 17  | 170.4, C              |                        |                                        |                                      |                                        |
| 18  | 21.1, CH <sub>3</sub> | 2.16 s                 |                                        | C-17                                 |                                        |

<sup>a</sup> Recorded at 125 MHz. <sup>b</sup> Recorded at 500 MHz.

**Table S3.** <sup>1</sup>H NMR and <sup>13</sup>C NMR data for **5–7** in CDCl<sub>3</sub>.

| NO.        | 5                                   |                                          | 6                                   |                                          | 7                                   |                                          |
|------------|-------------------------------------|------------------------------------------|-------------------------------------|------------------------------------------|-------------------------------------|------------------------------------------|
|            | $\delta_{\text{C}}^{\text{a}}$ type | $\delta_{\text{H}}^{\text{b}}$ (J in Hz) | $\delta_{\text{C}}^{\text{a}}$ type | $\delta_{\text{H}}^{\text{b}}$ (J in Hz) | $\delta_{\text{C}}^{\text{c}}$ type | $\delta_{\text{H}}^{\text{d}}$ (J in Hz) |
| <b>1</b>   | 43.8, C                             |                                          | 42.3, C                             |                                          | 45.1, C                             |                                          |
| <b>2</b>   | 139.6, CH                           | 5.47 s                                   | 142.1, CH                           | 5.71 m                                   | 136.9, CH                           | 5.55 s                                   |
| <b>3</b>   | 126.4, C                            |                                          | 126.7, C                            |                                          | 129.0, C                            |                                          |
| <b>4</b>   | 76.4, CH                            | 6.41 s                                   | 77.1, CH                            | 6.16 s                                   | 76.1, CH                            | 5.98 s                                   |
| <b>5</b>   | 203.2, C                            |                                          | 201.5, C                            |                                          | 200.6, C                            |                                          |
| <b>6</b>   | 44.5, CH <sub>2</sub>               | 2.61 m                                   | 40.7, CH <sub>2</sub>               | 2.53 m                                   | 43.4, CH <sub>2</sub>               | 2.74 m                                   |
| <b>7</b>   | 28.5, CH <sub>2</sub>               | 2.08 m                                   | 32.8, CH <sub>2</sub>               | 2.34 m                                   | 29.5, CH <sub>2</sub>               | 2.63 m                                   |
| <b>8</b>   | 144.8, C                            |                                          | 66.2, C                             |                                          | 173.0, C                            |                                          |
| <b>9</b>   | 124.6 CH                            | 5.68 m                                   | 59.7, CH                            | 3.47 d (2.7)                             | 127.6, CH                           | 6.13 s                                   |
| <b>10</b>  | 25.4, CH <sub>2</sub>               | 2.16 m                                   | 25.7, CH <sub>2</sub>               | 2.12 m; 1.92 m                           | 197.7, C                            |                                          |
| <b>11</b>  | 27.2, CH <sub>2</sub>               | 1.53 m                                   | 24.3, CH <sub>2</sub>               | 1.38 m; 1.14 m                           | 42.1, CH <sub>2</sub>               | 2.38 m                                   |
| <b>12</b>  | 39.2, CH                            | 1.90 m                                   | 40.1, CH                            | 1.52 m                                   | 39.1, CH                            | 2.54 m                                   |
| <b>13</b>  | 22.7, CH <sub>3</sub>               | 1.00 s                                   | 18.8, CH <sub>3</sub>               | 1.10 s                                   | 20.6, CH <sub>3</sub>               | 1.21 s                                   |
| <b>14</b>  | 18.4, CH <sub>3</sub>               | 1.67 d (1.6)                             | 17.7, CH <sub>3</sub>               | 1.69 d (1.5)                             | 18.1, CH <sub>3</sub>               | 1.75 s                                   |
| <b>15</b>  | 17.1, CH <sub>3</sub>               | 0.93 d (7.0)                             | 17.2, CH <sub>3</sub>               | 0.84 d (6.8)                             | 16.9, CH <sub>3</sub>               | 1.07 d (8.4)                             |
| <b>OAc</b> | 170.4, C                            |                                          | 170.4, C                            |                                          | 170.0, C                            |                                          |
| <b>OAc</b> | 20.7, CH <sub>3</sub>               | 2.09 s                                   | 20.7, CH <sub>3</sub>               | 2.15 s                                   | 20.5, CH <sub>3</sub>               | 2.11 s                                   |

<sup>a</sup> Recorded at 125 MHz. <sup>b</sup> Recorded at 500 MHz. <sup>c</sup> Recorded at 100 MHz. <sup>d</sup> Recorded at 400 MHz.

## 2. X-ray crystallographic analyses of 1–4.

Lemneolemnane A (**1**) was obtained as colorless crystal from a methanol solvent system using the vapor diffusion method. Crystallographic data for **1** in this article have been deposited at the Cambridge Crystallographic Data Centre as supplementary publication number 2311688. The data can be obtained via [www.ccdc.cam.ac.uk/products/csd/request](http://www.ccdc.cam.ac.uk/products/csd/request).

Lemneolemnane B (**2**) was obtained as colorless crystal from a methanol solvent system using the vapor diffusion method. Crystallographic data for **2** in this article have been deposited at the Cambridge Crystallographic Data Centre as supplementary publication number 2311689. The data can be obtained via [www.ccdc.cam.ac.uk/products/csd/request](http://www.ccdc.cam.ac.uk/products/csd/request).

Lemneolemnane C (**3**) was obtained as colorless crystal from a methanol solvent system using the vapor diffusion method. Crystallographic data for **3** in this article have been deposited at the Cambridge Crystallographic Data Centre as supplementary publication number 2311686. The data can be obtained via [www.ccdc.cam.ac.uk/products/csd/request](http://www.ccdc.cam.ac.uk/products/csd/request).

Lemneolemnane D (**4**) was obtained as colorless crystal from a methanol solvent system using the vapor diffusion method. Crystallographic data for **4** in this article have been deposited at the Cambridge Crystallographic Data Centre as supplementary publication number 2311690. The data can be obtained via [www.ccdc.cam.ac.uk/products/csd/request](http://www.ccdc.cam.ac.uk/products/csd/request).

**Table S4.** X-ray diffraction analysis of Lemneolemnane A (1).

|                                             |                                                               |
|---------------------------------------------|---------------------------------------------------------------|
| Empirical formula                           | C <sub>18</sub> H <sub>26</sub> O <sub>4</sub>                |
| Formula weight                              | 306.39                                                        |
| Temperature/K                               | 293(2)                                                        |
| Crystal system                              | orthorhombic                                                  |
| Space group                                 | P2 <sub>1</sub> 2 <sub>1</sub> 2 <sub>1</sub>                 |
| a/Å                                         | 7.5112(3)                                                     |
| b/Å                                         | 8.4632(3)                                                     |
| c/Å                                         | 26.8781(9)                                                    |
| $\alpha$ /°                                 | 90                                                            |
| $\beta$ /°                                  | 90                                                            |
| $\gamma$ /°                                 | 90                                                            |
| Volume/Å <sup>3</sup>                       | 1708.61(11)                                                   |
| Z                                           | 4                                                             |
| $\rho$ calc/g/cm <sup>3</sup>               | 1.191                                                         |
| $\mu$ /mm <sup>-1</sup>                     | 0.667                                                         |
| F (000)                                     | 664.0                                                         |
| Crystal size/mm <sup>3</sup>                | 0.2 × 0.15 × 0.1                                              |
| Radiation                                   | CuK $\alpha$ ( $\lambda$ = 1.54184)                           |
| 2 $\Theta$ range for data collection/°      | 6.578 to 142.1                                                |
| Index ranges                                | -4 ≤ h ≤ 9, -9 ≤ k ≤ 10, -32 ≤ l ≤ 14                         |
| Reflections collected                       | 4136                                                          |
| Independent reflections                     | 2700 [R <sub>int</sub> = 0.0512, R <sub>sigma</sub> = 0.0656] |
| Data/restraints/parameters                  | 2700/0/204                                                    |
| Goodness-of-fit on F <sup>2</sup>           | 1.039                                                         |
| Final R indexes [I ≥ 2 $\sigma$ (I)]        | R <sub>1</sub> = 0.0615, wR <sub>2</sub> = 0.1931             |
| Final R indexes [all data]                  | R <sub>1</sub> = 0.0831, wR <sub>2</sub> = 0.2352             |
| Largest diff. peak/hole / e Å <sup>-3</sup> | 0.27/-0.23                                                    |
| Flack parameter                             | 0.2(7)                                                        |



**Table S5.** X-ray diffraction analysis of Lemneolemnane B (2).

|                                             |                                                               |
|---------------------------------------------|---------------------------------------------------------------|
| Empirical formula                           | C <sub>18</sub> H <sub>26</sub> O <sub>4</sub>                |
| Formula weight                              | 306.39                                                        |
| Temperature/K                               | 150.00                                                        |
| Crystal system                              | orthorhombic                                                  |
| Space group                                 | P2 <sub>1</sub> 2 <sub>1</sub> 2 <sub>1</sub>                 |
| a/Å                                         | 9.1612(4)                                                     |
| b/Å                                         | 12.9171(6)                                                    |
| c/Å                                         | 13.6650(6)                                                    |
| $\alpha$ /°                                 | 90                                                            |
| $\beta$ /°                                  | 90                                                            |
| $\gamma$ /°                                 | 90                                                            |
| Volume/Å <sup>3</sup>                       | 1617.06(13)                                                   |
| Z                                           | 4                                                             |
| $\rho$ calc/g/cm <sup>3</sup>               | 1.258                                                         |
| $\mu$ /mm <sup>-1</sup>                     | 0.705                                                         |
| F (000)                                     | 664.0                                                         |
| Crystal size/mm <sup>3</sup>                | 0.2 × 0.15 × 0.1                                              |
| Radiation                                   | CuK $\alpha$ ( $\lambda$ = 1.54178)                           |
| 2 $\Theta$ range for data collection/°      | 9.422 to 149.678                                              |
| Index ranges                                | -11 ≤ h ≤ 11, -14 ≤ k ≤ 16, -16 ≤ l ≤ 14                      |
| Reflections collected                       | 8486                                                          |
| Independent reflections                     | 3192 [R <sub>int</sub> = 0.0250, R <sub>sigma</sub> = 0.0269] |
| Data/restraints/parameters                  | 3192/0/204                                                    |
| Goodness-of-fit on F <sup>2</sup>           | 1.132                                                         |
| Final R indexes [I ≥ 2 $\sigma$ (I)]        | R <sub>1</sub> = 0.0606, wR <sub>2</sub> = 0.1444             |
| Final R indexes [all data]                  | R <sub>1</sub> = 0.0607, wR <sub>2</sub> = 0.1446             |
| Largest diff. peak/hole / e Å <sup>-3</sup> | 0.32/-0.20                                                    |
| Flack parameter                             | 0.02(6)                                                       |

**Table S6.** X-ray diffraction analysis of Lemneolemnane C (**3**).

|                                             |                                                               |
|---------------------------------------------|---------------------------------------------------------------|
| Empirical formula                           | C <sub>18</sub> H <sub>26</sub> O <sub>5</sub>                |
| Formula weight                              | 322.39                                                        |
| Temperature/K                               | 150.00                                                        |
| Crystal system                              | orthorhombic                                                  |
| Space group                                 | P2 <sub>1</sub> 2 <sub>1</sub> 2 <sub>1</sub>                 |
| a/Å                                         | 8.3795(2)                                                     |
| b/Å                                         | 8.5769(3)                                                     |
| c/Å                                         | 47.3938(14)                                                   |
| $\alpha$ /°                                 | 90                                                            |
| $\beta$ /°                                  | 90                                                            |
| $\gamma$ /°                                 | 90                                                            |
| Volume/Å <sup>3</sup>                       | 3406.20(18)                                                   |
| Z                                           | 8                                                             |
| $\rho_{\text{calc}}/\text{cm}^3$            | 1.257                                                         |
| $\mu/\text{mm}^{-1}$                        | 0.741                                                         |
| F (000)                                     | 1392.0                                                        |
| Crystal size/mm <sup>3</sup>                | 0.2 × 0.15 × 0.1                                              |
| Radiation                                   | CuK $\alpha$ ( $\lambda$ = 1.54178)                           |
| 2 $\Theta$ range for data collection/°      | 7.46 to 149.254                                               |
| Index ranges                                | -9 ≤ h ≤ 10, -10 ≤ k ≤ 10, -58 ≤ l ≤ 59                       |
| Reflections collected                       | 23967                                                         |
| Independent reflections                     | 6894 [R <sub>int</sub> = 0.0406, R <sub>sigma</sub> = 0.0425] |
| Data/restraints/parameters                  | 6894/0/425                                                    |
| Goodness-of-fit on F <sup>2</sup>           | 1.095                                                         |
| Final R indexes [I ≥ 2 $\sigma$ (I)]        | R <sub>1</sub> = 0.0945, wR <sub>2</sub> = 0.2733             |
| Final R indexes [all data]                  | R <sub>1</sub> = 0.0963, wR <sub>2</sub> = 0.2765             |
| Largest diff. peak/hole / e Å <sup>-3</sup> | 0.39/-0.35                                                    |
| Flack parameter                             | 0.21(6)                                                       |

**Table S7.** X-ray diffraction analysis of Lemneolemnane D (**4**).

|                                             |                                                               |
|---------------------------------------------|---------------------------------------------------------------|
| Empirical formula                           | C <sub>15</sub> H <sub>20</sub> O <sub>3</sub>                |
| Formula weight                              | 248.31                                                        |
| Temperature/K                               | 150.00                                                        |
| Crystal system                              | monoclinic                                                    |
| Space group                                 | P2 <sub>1</sub>                                               |
| a/Å                                         | 7.4946(3)                                                     |
| b/Å                                         | 6.8964(2)                                                     |
| c/Å                                         | 12.8420(4)                                                    |
| $\alpha$ /°                                 | 90                                                            |
| $\beta$ /°                                  | 102.246(2)                                                    |
| $\gamma$ /°                                 | 90                                                            |
| Volume/Å <sup>3</sup>                       | 648.65(4)                                                     |
| Z                                           | 2                                                             |
| $\rho$ calc/gcm <sup>3</sup>                | 1.271                                                         |
| $\mu$ /mm <sup>-1</sup>                     | 0.701                                                         |
| F (000)                                     | 268.0                                                         |
| Crystal size/mm <sup>3</sup>                | 0.2 × 0.15 × 0.1                                              |
| Radiation                                   | CuK $\alpha$ ( $\lambda$ = 1.54178)                           |
| 2 $\Theta$ range for data collection/°      | 7.044 to 149.35                                               |
| Index ranges                                | -9 ≤ h ≤ 9, -6 ≤ k ≤ 8, -16 ≤ l ≤ 16                          |
| Reflections collected                       | 5883                                                          |
| Independent reflections                     | 2326 [R <sub>int</sub> = 0.0358, R <sub>sigma</sub> = 0.0363] |
| Data/restraints/parameters                  | 2326/1/167                                                    |
| Goodness-of-fit on F <sup>2</sup>           | 1.059                                                         |
| Final R indexes [I ≥ 2 $\sigma$ (I)]        | R <sub>1</sub> = 0.0576, wR <sub>2</sub> = 0.1455             |
| Final R indexes [all data]                  | R <sub>1</sub> = 0.0613, wR <sub>2</sub> = 0.1502             |
| Largest diff. peak/hole / e Å <sup>-3</sup> | 0.29/-0.17                                                    |
| Flack parameter                             | -0.1(2)                                                       |

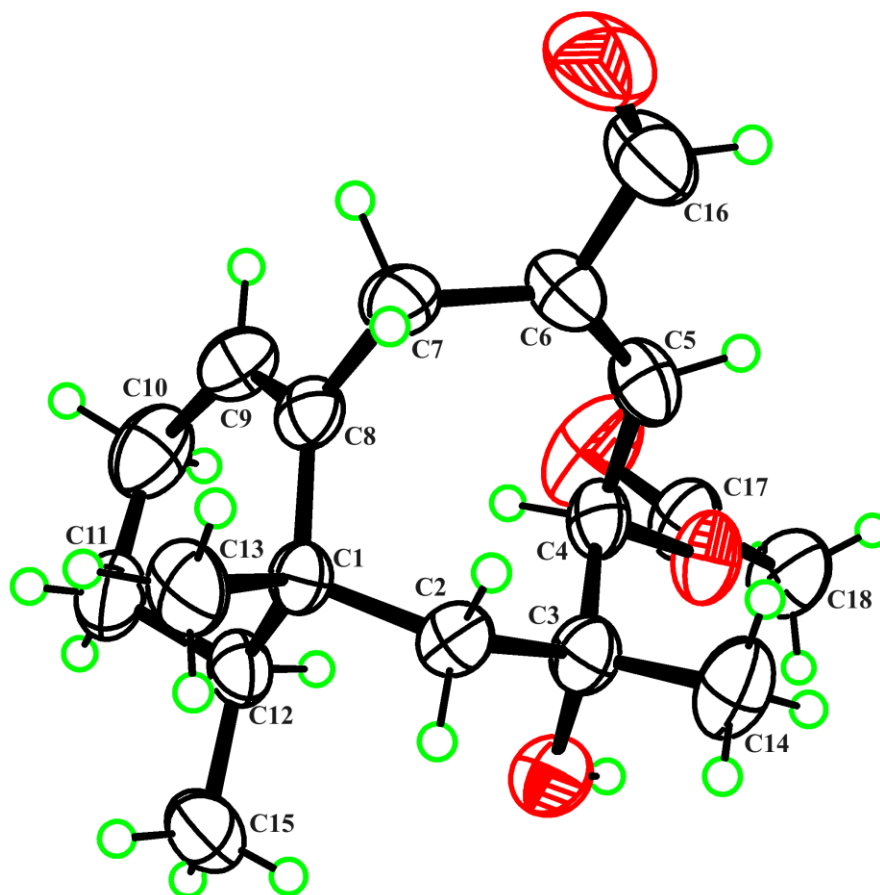

**Figure S1.** ORTEP diagrams of 1 (displacement ellipsoids are drawn at the 50% probability level).

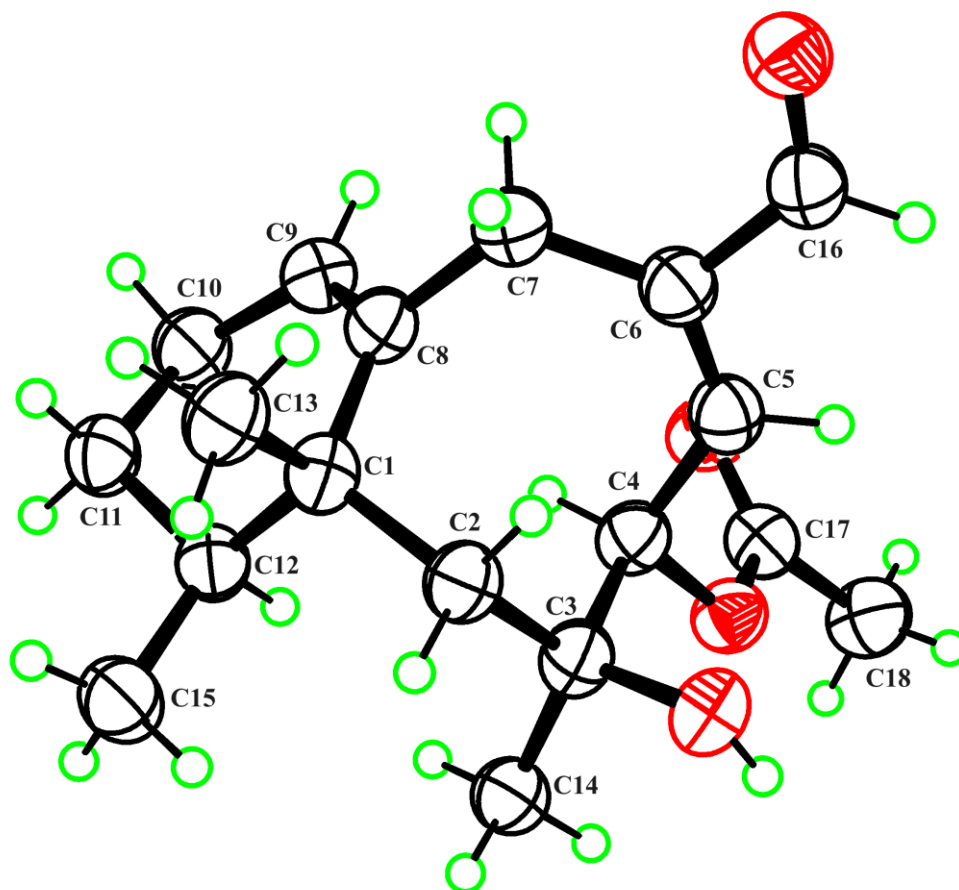

**Figure S2.** ORTEP diagrams of **2** (displacement ellipsoids are drawn at the 50% probability level).

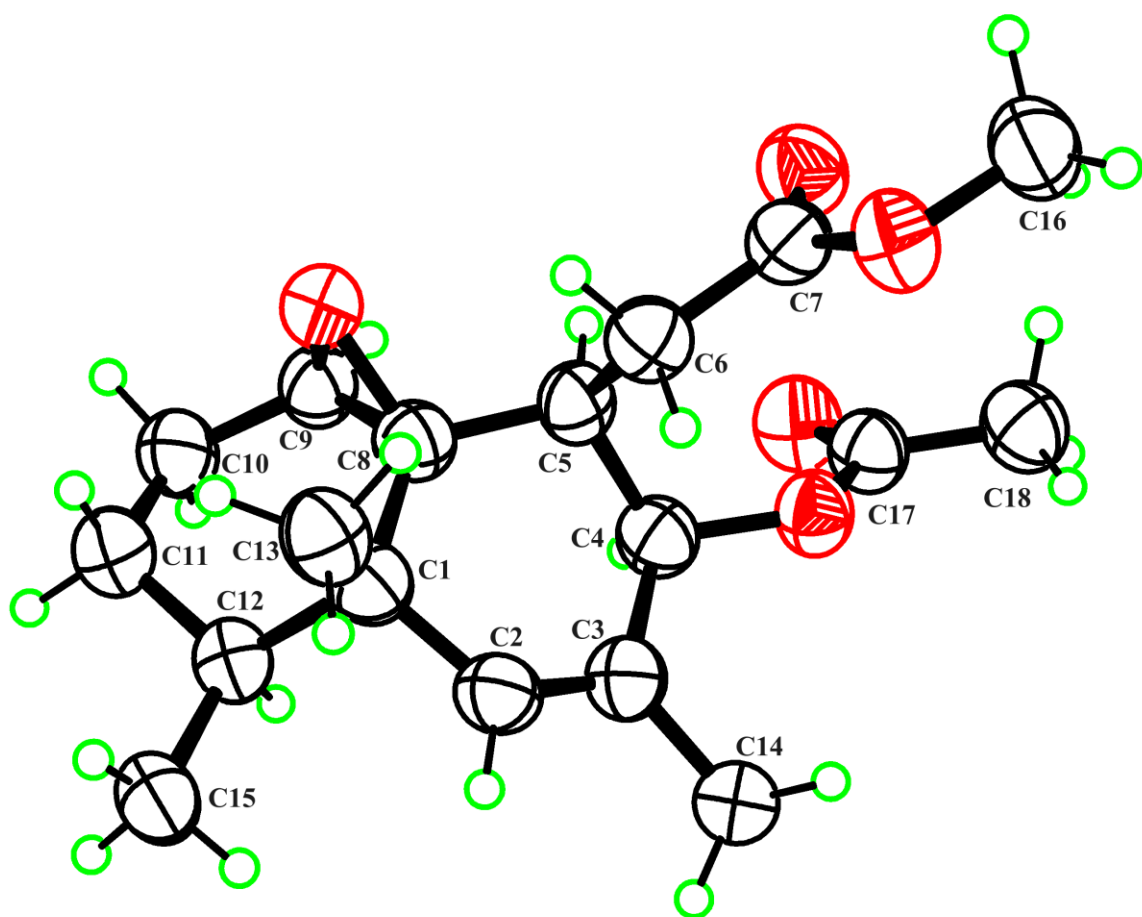

**Figure S3.** ORTEP diagrams of 3 (displacement ellipsoids are drawn at the 50% probability level).

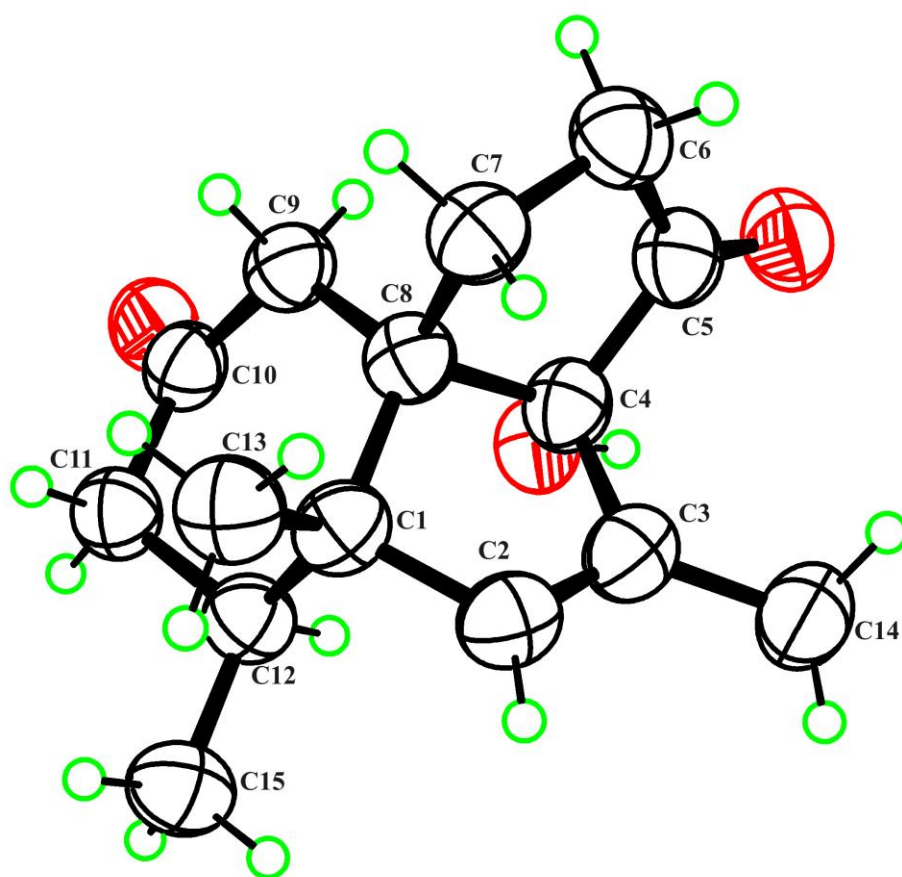

**Figure S4.** ORTEP diagrams of **4** (displacement ellipsoids are drawn at the 50% probability level).

### 3. Anti-Alzheimer's disease activity.

**Table S8.** Data related to anti-Alzheimer's disease activity testing

| Time (h)                                                  | Contr<br>ol             | Contr<br>ol | Contr<br>ol | Memant<br>ine | Memant<br>ine | Memant<br>ine | Compoun<br>d 1 | Compoun<br>d 1 | Compoun<br>d 1 |
|-----------------------------------------------------------|-------------------------|-------------|-------------|---------------|---------------|---------------|----------------|----------------|----------------|
| 34                                                        | 12                      | 10          | 13          | 2             | 4             | 3             | 9              | 7              | 8              |
| 36                                                        | 9                       | 6           | 12          | 4             | 4             | 2             | 4              | 3              | 6              |
| 38                                                        | 13                      | 9           | 8           | 5             | 3             | 4             | 2              | 3              | 5              |
| 40                                                        | 8                       | 7           | 9           | 4             | 5             | 5             | 3              | 4              | 5              |
| Number of remaining<br>unparalyzed                        | 3                       | 2           | 4           | 18            | 19            | 17            | 12             | 15             | 14             |
| Total number                                              | 45                      | 34          | 46          | 33            | 35            | 31            | 30             | 32             | 38             |
| Time (h)                                                  | Percentage of survivors |             |             |               |               |               |                |                |                |
| 34                                                        | 73.33                   | 70.59       | 71.74       | 93.94         | 88.57         | 90.32         | 70.00          | 78.13          | 78.95          |
| 36                                                        | 53.33                   | 52.94       | 45.65       | 81.82         | 77.14         | 83.87         | 56.67          | 68.75          | 63.16          |
| 38                                                        | 24.44                   | 26.47       | 28.26       | 66.67         | 68.57         | 70.97         | 50.00          | 59.38          | 50.00          |
| 40                                                        | 6.67                    | 5.88        | 8.70        | 54.55         | 54.29         | 54.84         | 40.00          | 46.88          | 36.84          |
| Average survival rate<br>(MEAN)<br>Standard deviation(SD) | Contr<br>ol             | MEA<br>N    | SD          | Memant<br>ine | MEAN          | SD            | Compoun<br>d 1 | MEAN           | SD             |
|                                                           |                         | 71.89       | 1.38        |               | 90.94         | 2.74          |                | 75.69          | 4.95           |
|                                                           |                         | 50.64       | 4.33        |               | 80.94         | 3.45          |                | 62.86          | 6.05           |
|                                                           |                         | 26.39       | 1.91        |               | 68.74         | 2.16          |                | 53.13          | 5.41           |
|                                                           |                         | 7.08        | 1.45        |               | 54.56         | 0.28          |                | 41.24          | 5.13           |



## 4. The 1D and 2D NMR spectra of 1–4

20221010-LS725f23\_221010112845 #58-61 RT: 0.82-0.86 AV: 4 NL: 7.75E5  
T: FTMS + p ESI Full ms [180.00-1000.00]

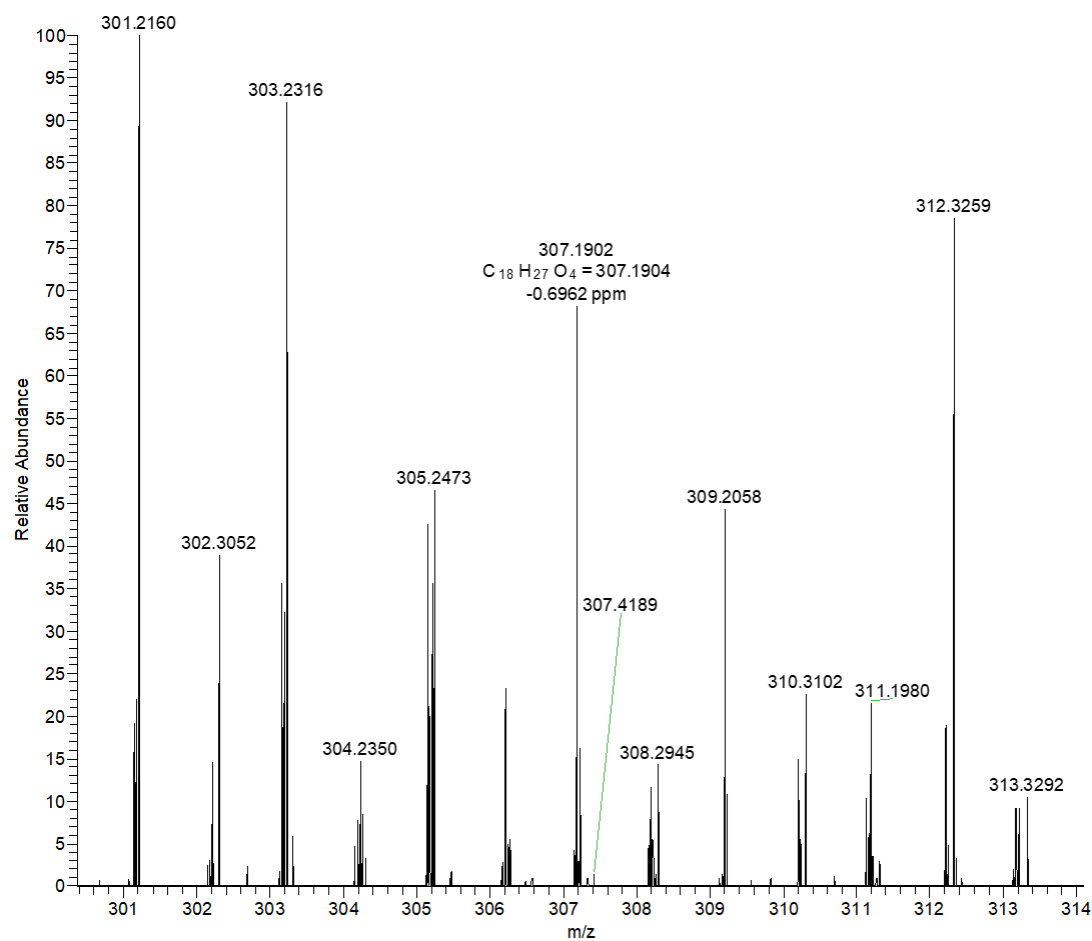

Figure S5. HRESIMS spectrum of compound 1.

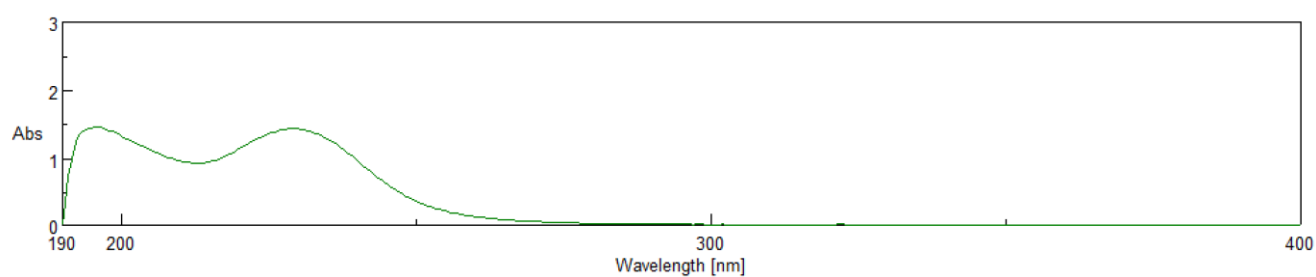

Figure S6. UV spectrum of compound 1.

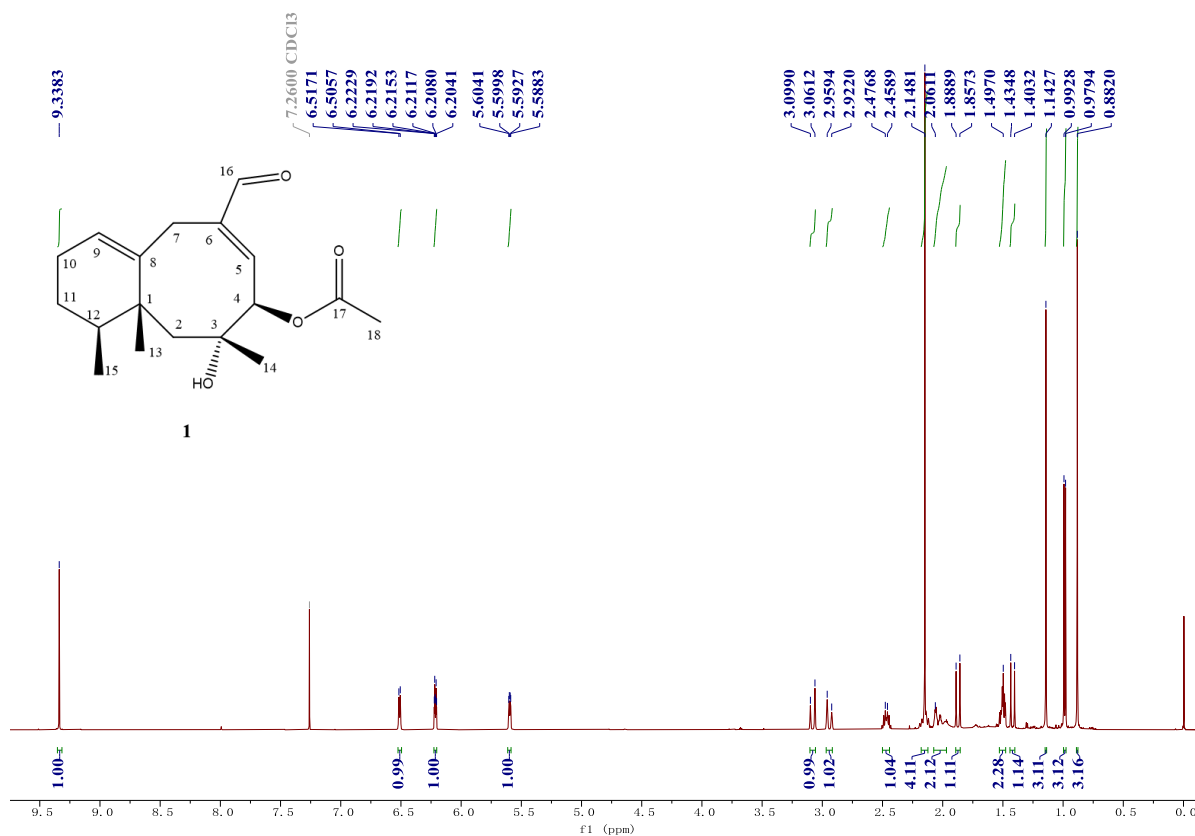

Figure S7. <sup>1</sup>H NMR spectrum of compound **1** in CDCl<sub>3</sub>, 500MHz.

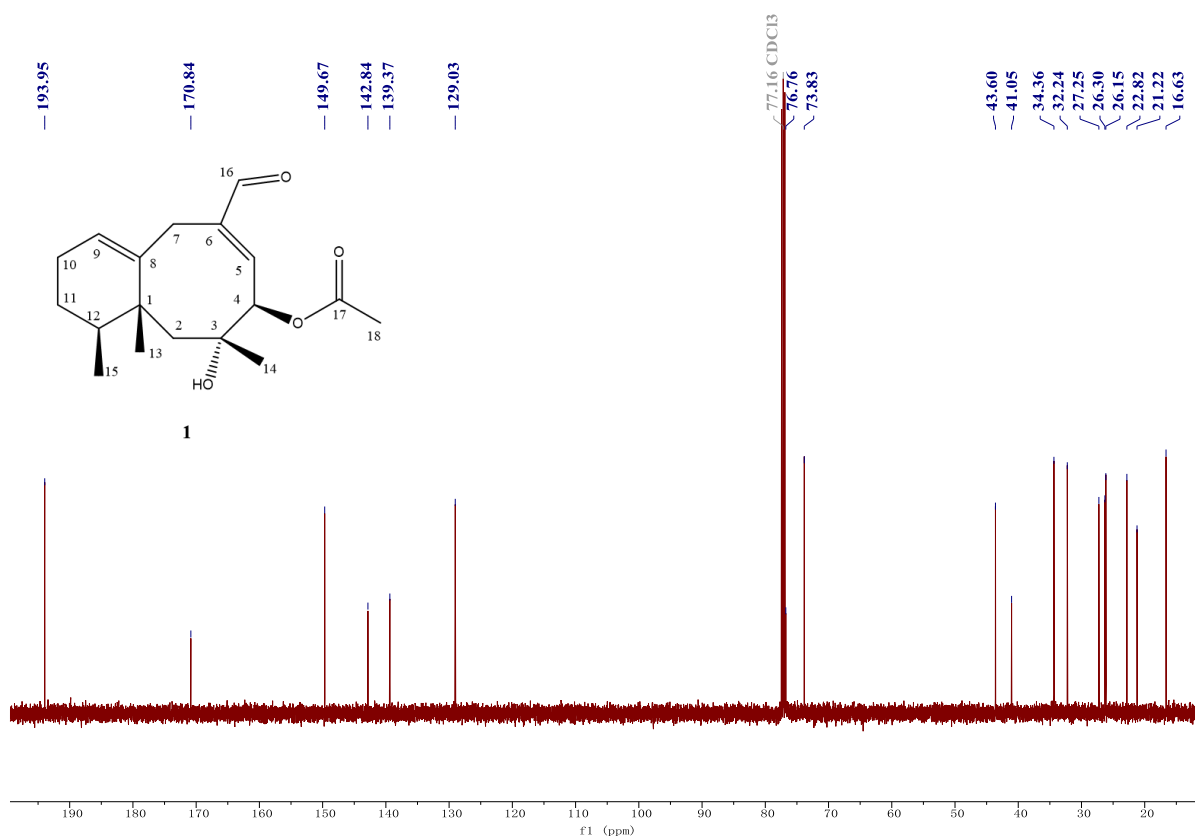

Figure S8. <sup>13</sup>C NMR spectrum of compound **1** in CDCl<sub>3</sub>, 125MHz.

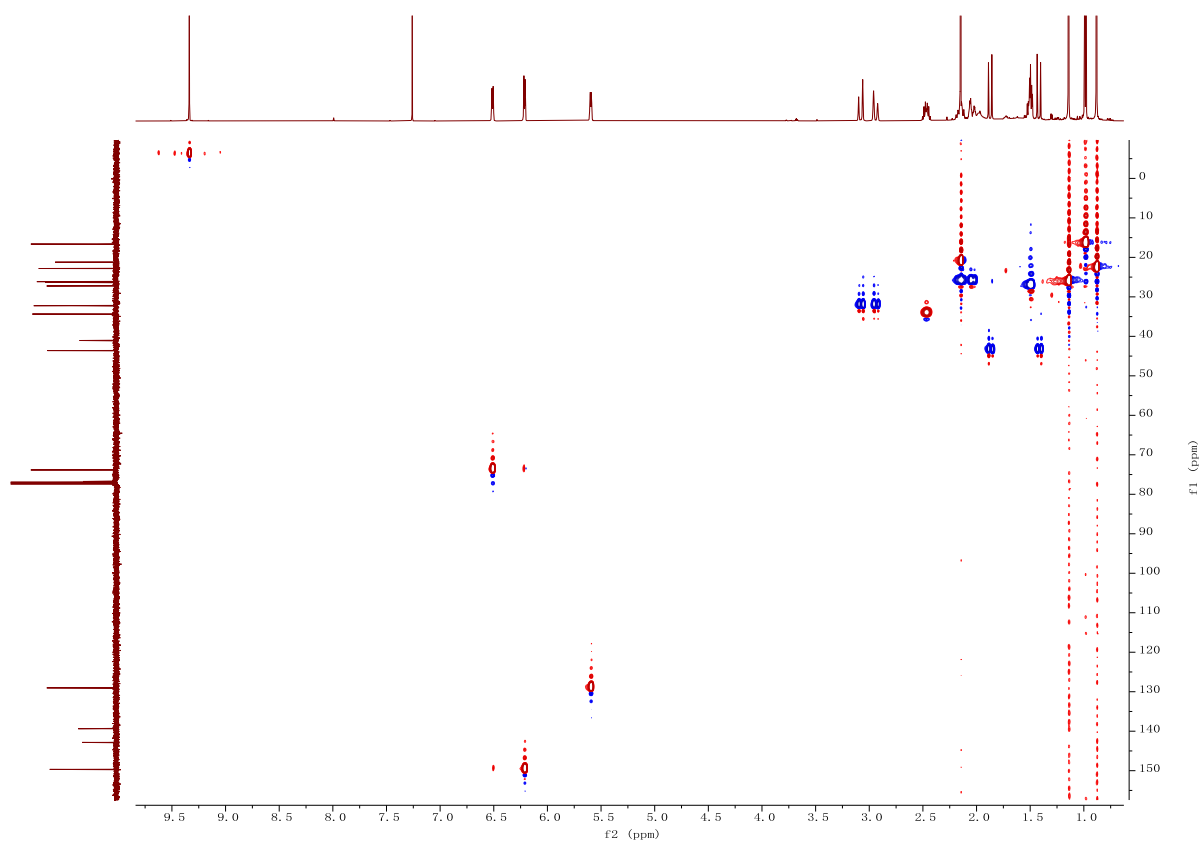

**Figure S9.** HSQC spectrum of compound **1** in  $\text{CDCl}_3$ , 500MHz.

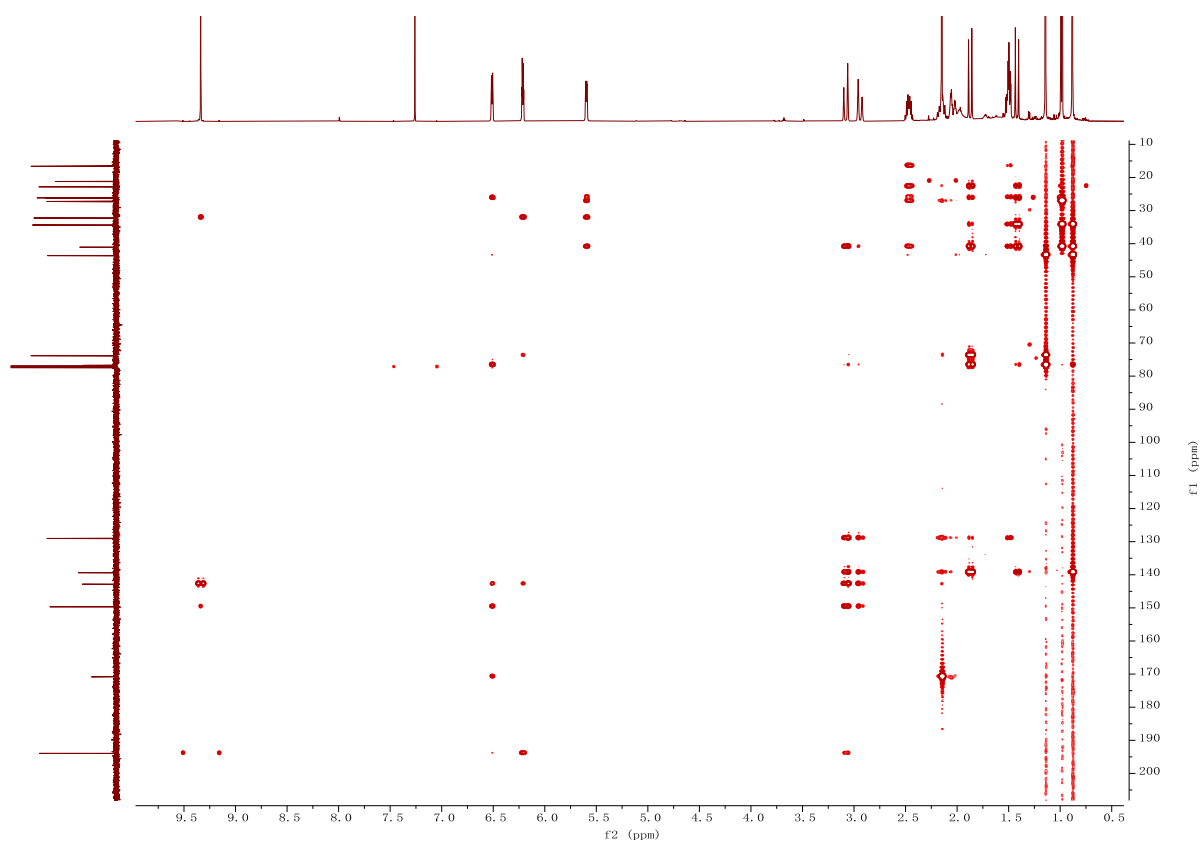

**Figure S10.** HMBC NMR spectrum of compound **1** in  $\text{CDCl}_3$ , 500MHz.

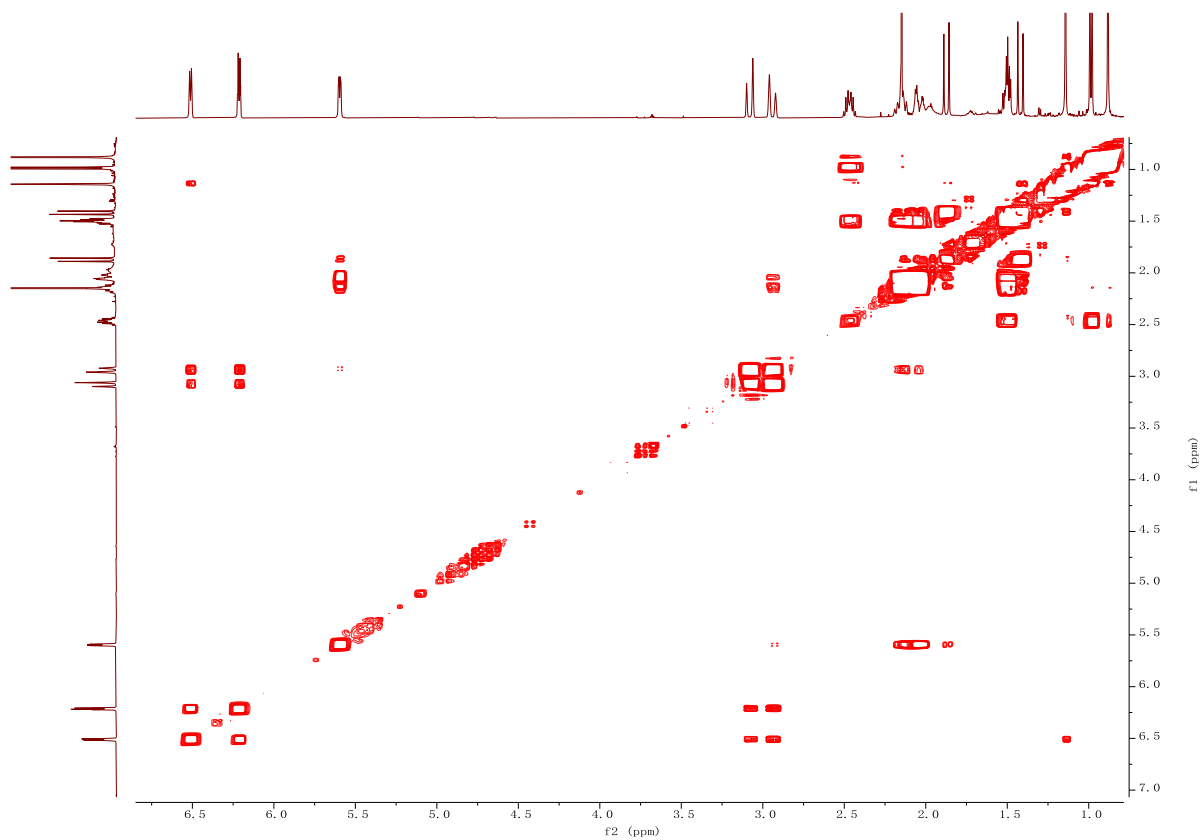

**Figure S11.**  $^1\text{H}$ - $^1\text{H}$  COSY NMR spectrum of compound **1** in  $\text{CDCl}_3$ , 500MHz.

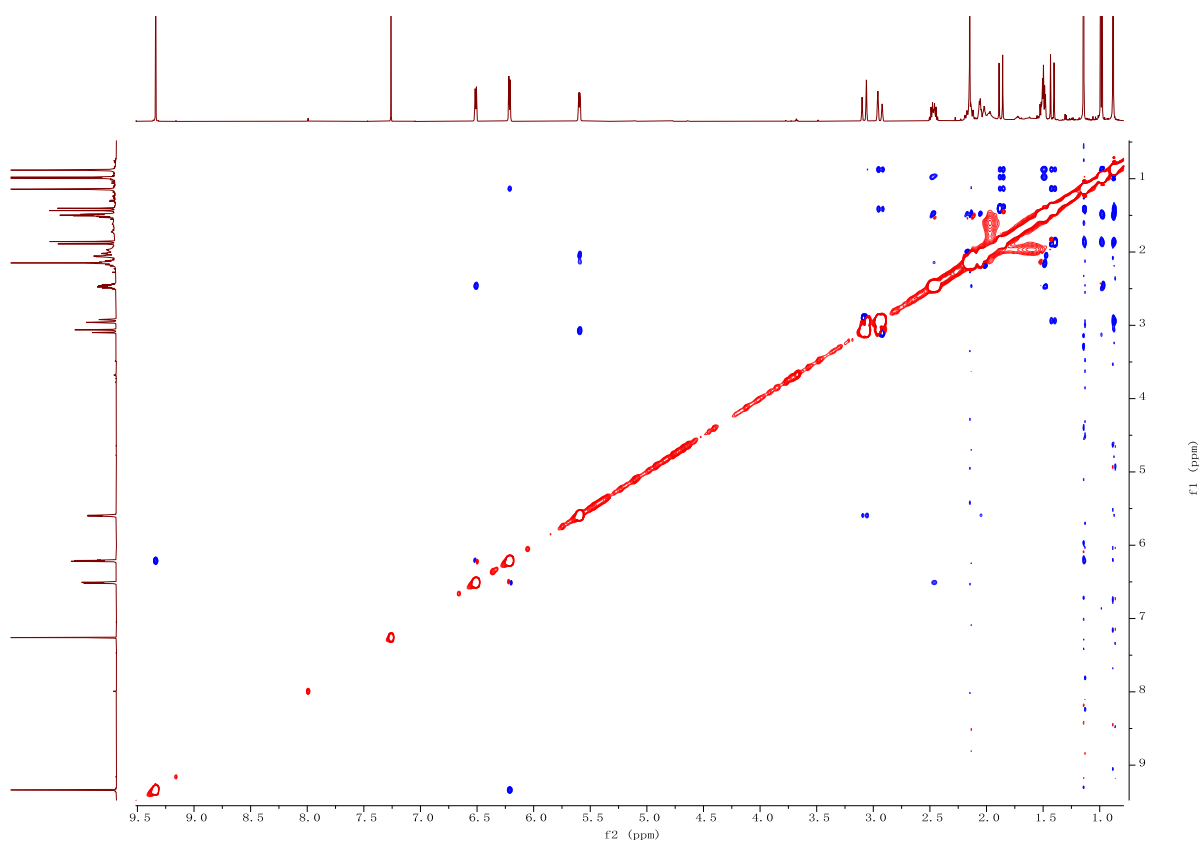

**Figure S12.** NOESY NMR spectrum of compound **1** in  $\text{CDCl}_3$ , 500MHz.

20230414-Is1165f22\_230414100735 #12 RT: 0.11 AV: 1 NL: 1.70E6  
T: FTMS + p ESI Full ms [200.00-2000.00]

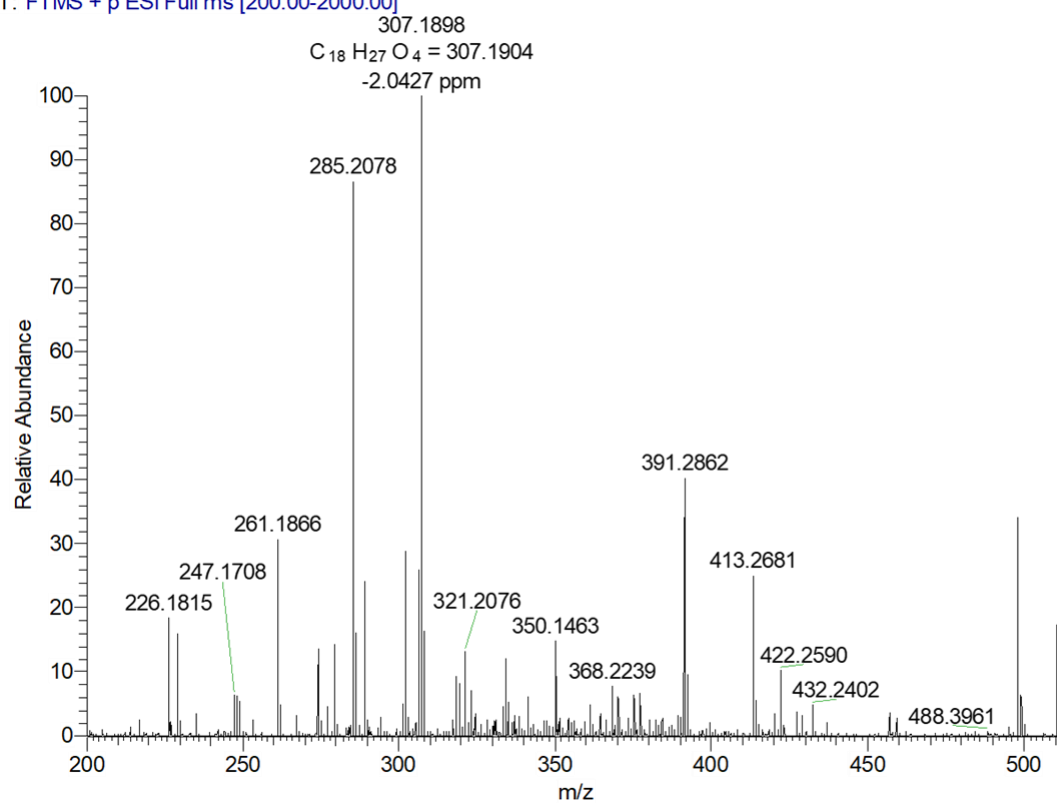

**Figure S13.** HRESIMS spectrum of compound 2.

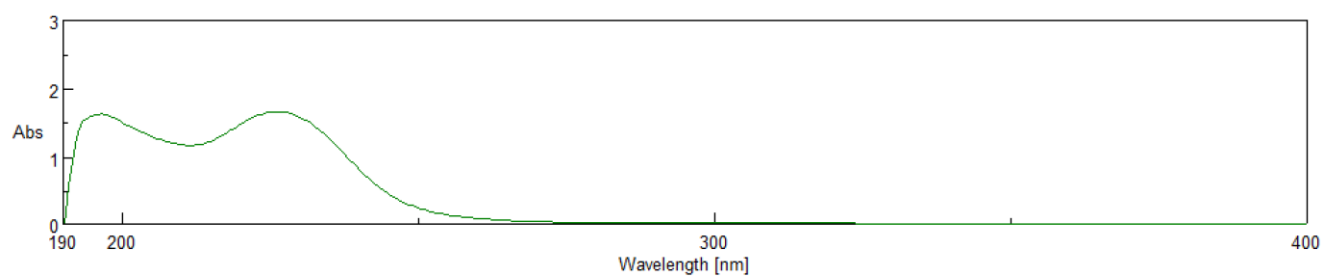

**Figure S14.** UV spectrum of compound 2.

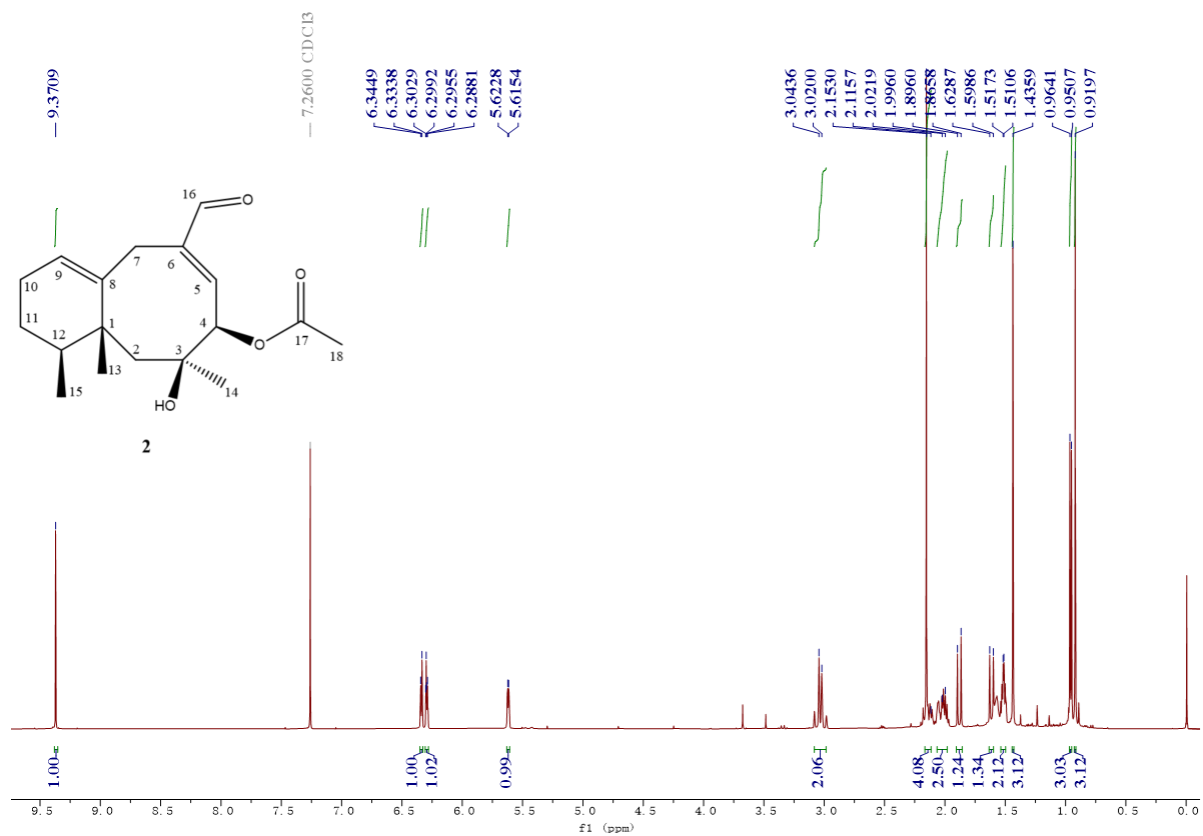

**Figure S15.**  $^1\text{H}$  NMR spectrum of compound 2 in  $\text{CDCl}_3$ , 500MHz.

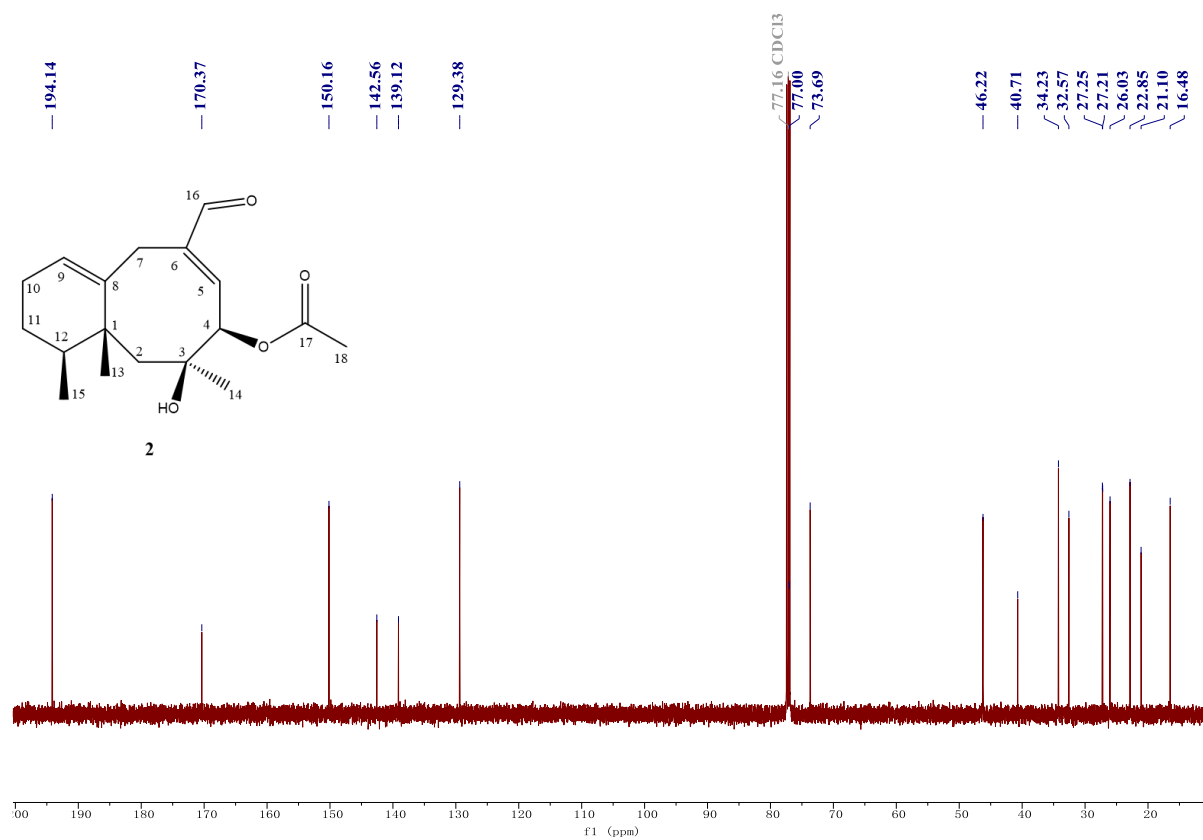

**Figure S16.**  $^{13}\text{C}$  NMR spectrum of compound 2 in  $\text{CDCl}_3$ , 125MHz.

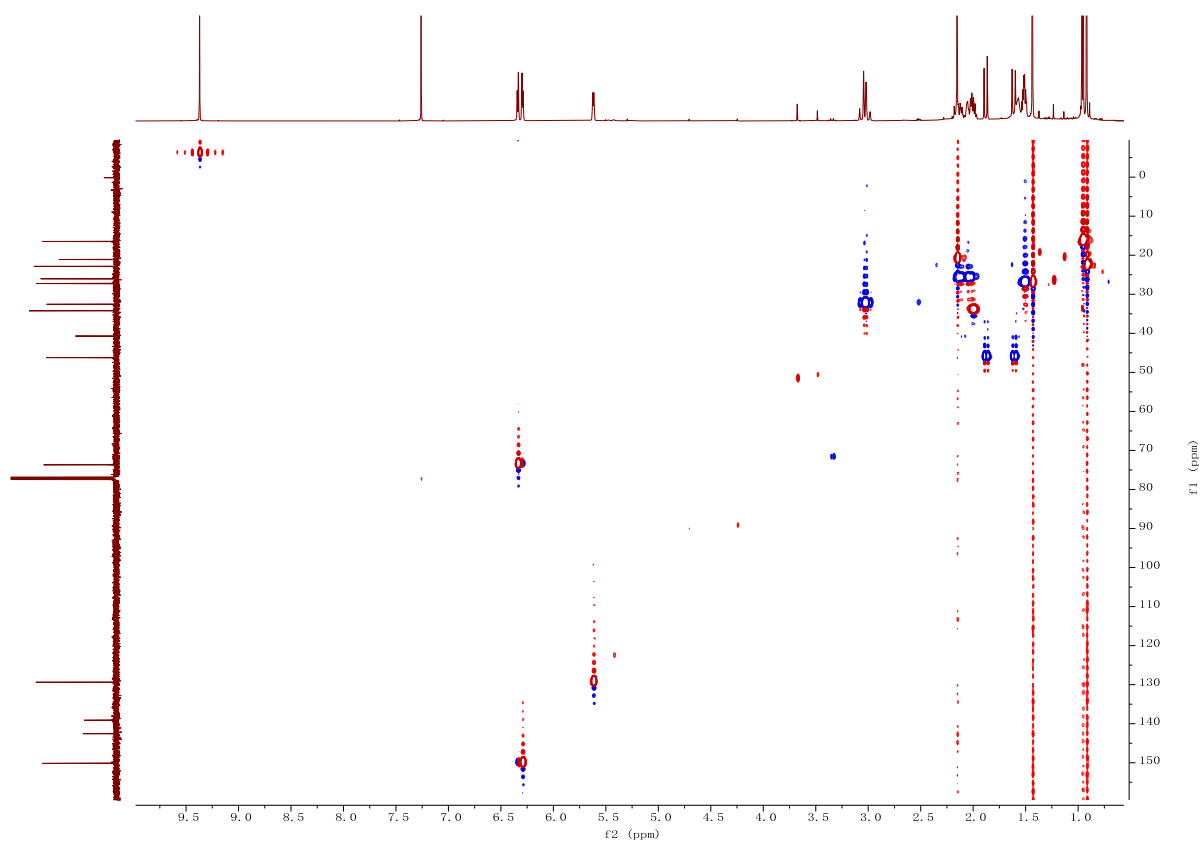

**Figure S17.** HSQC spectrum of compound **2** in  $\text{CDCl}_3$ , 500MHz.

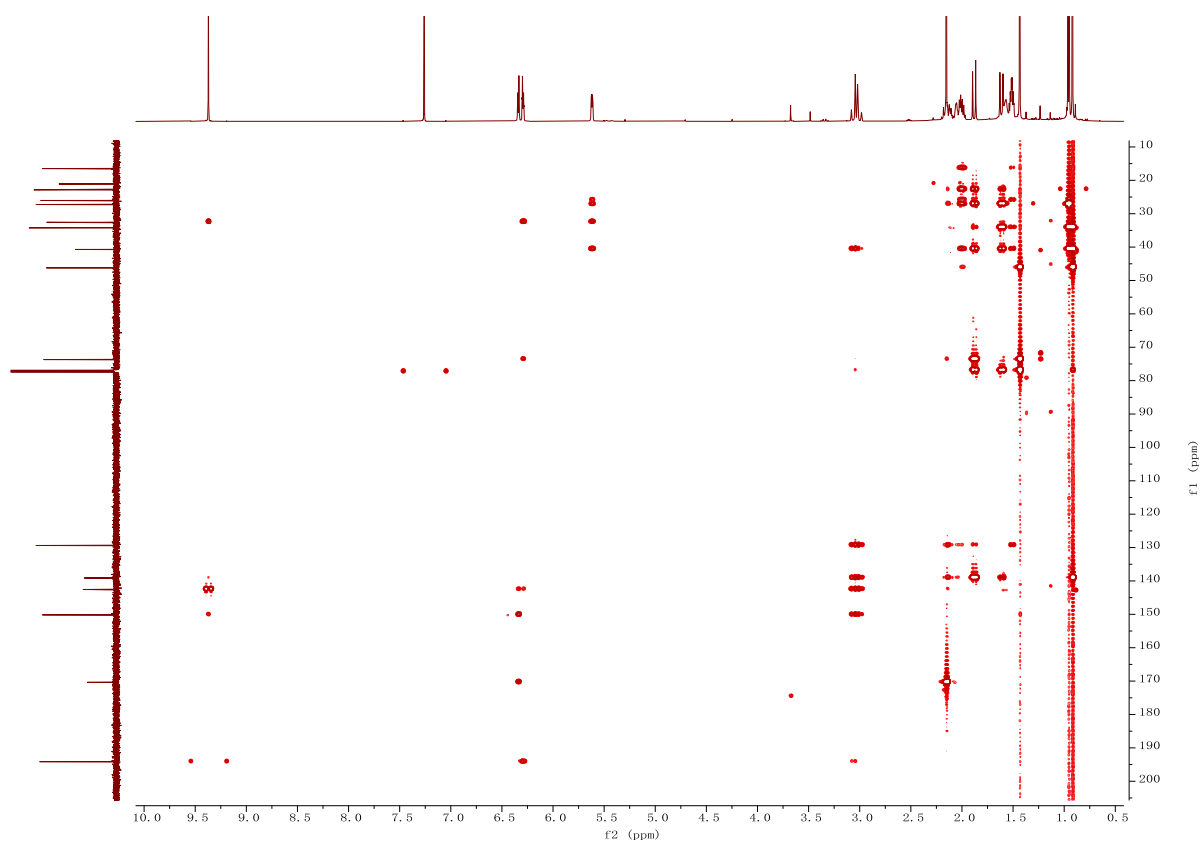

**Figure S18.** HMBC NMR spectrum of compound **2** in  $\text{CDCl}_3$ , 500MHz.

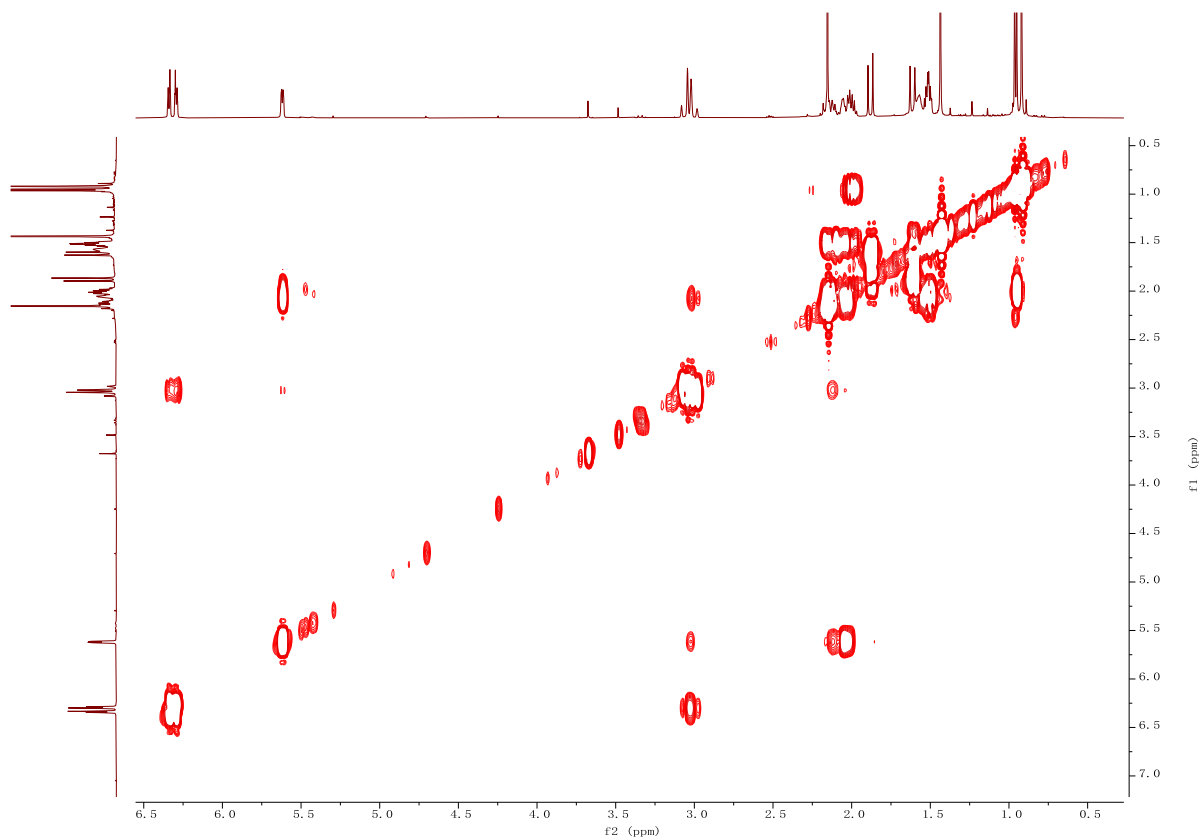

**Figure S19.**  $^1\text{H}$ - $^1\text{H}$  COSY NMR spectrum of compound **2** in  $\text{CDCl}_3$ , 500MHz.

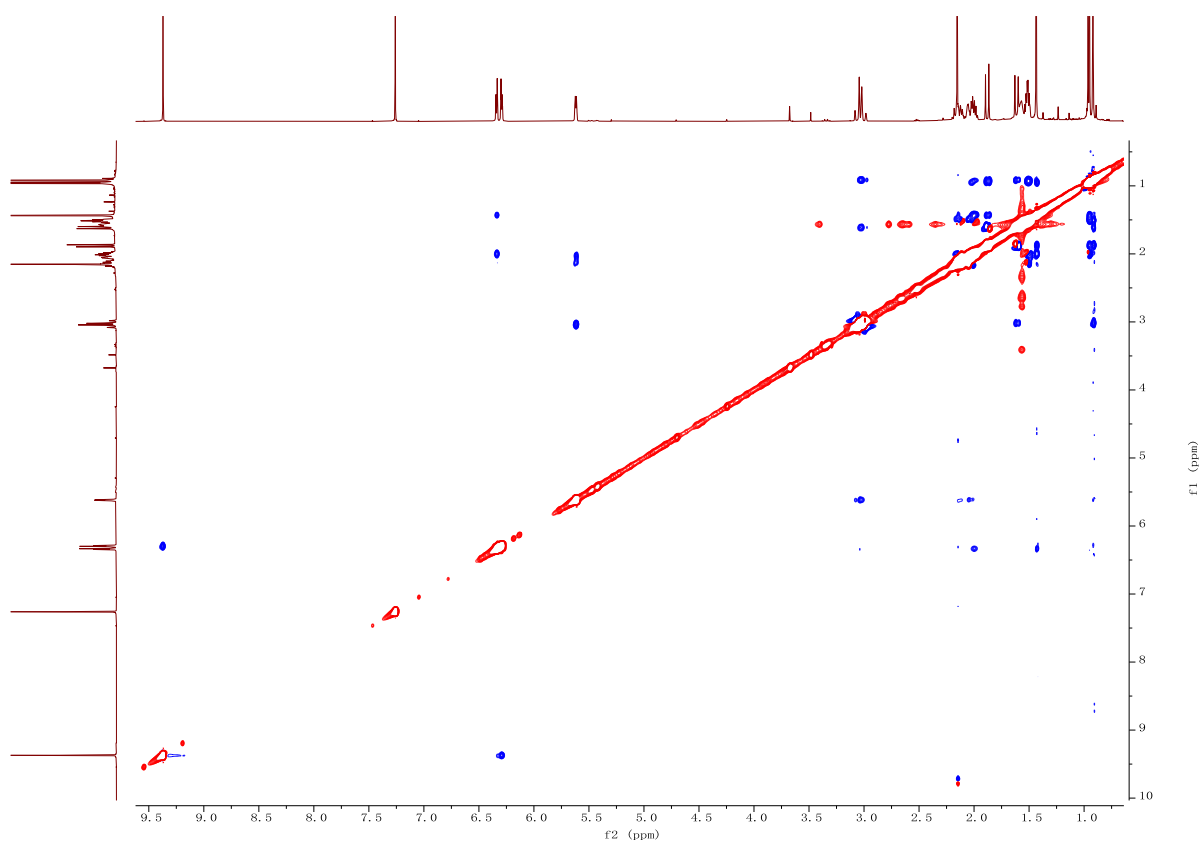

**Figure S20.** NOESY NMR spectrum of compound **2** in  $\text{CDCl}_3$ , 500MHz.



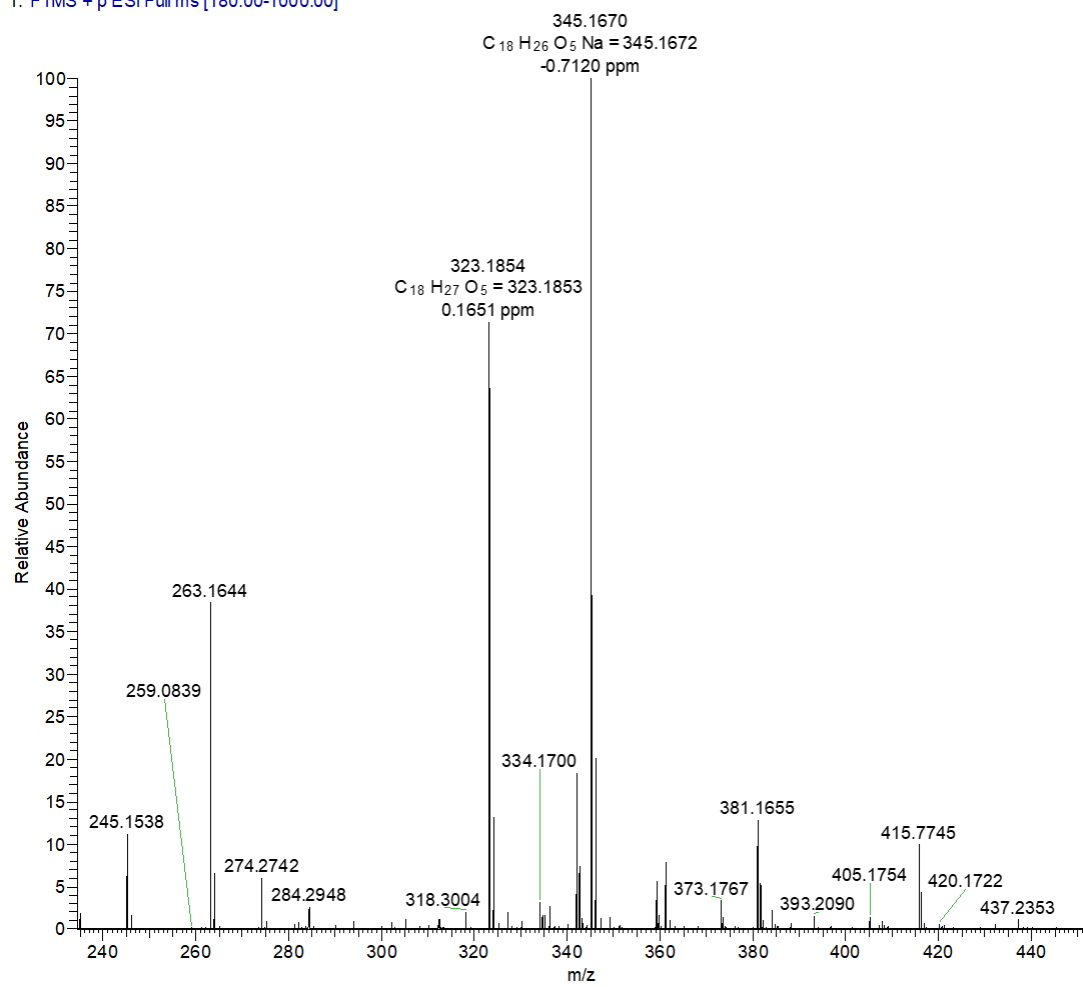

Figure S21. HRESIMS spectrum of compound 3.

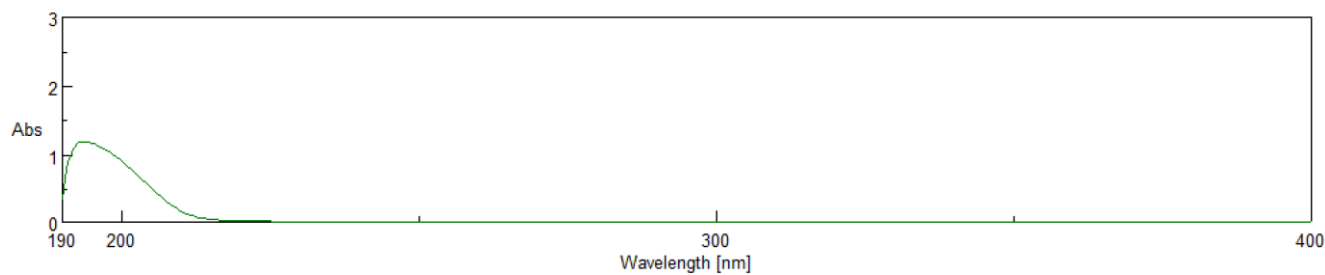

Figure S22. UV spectrum of compound 3.

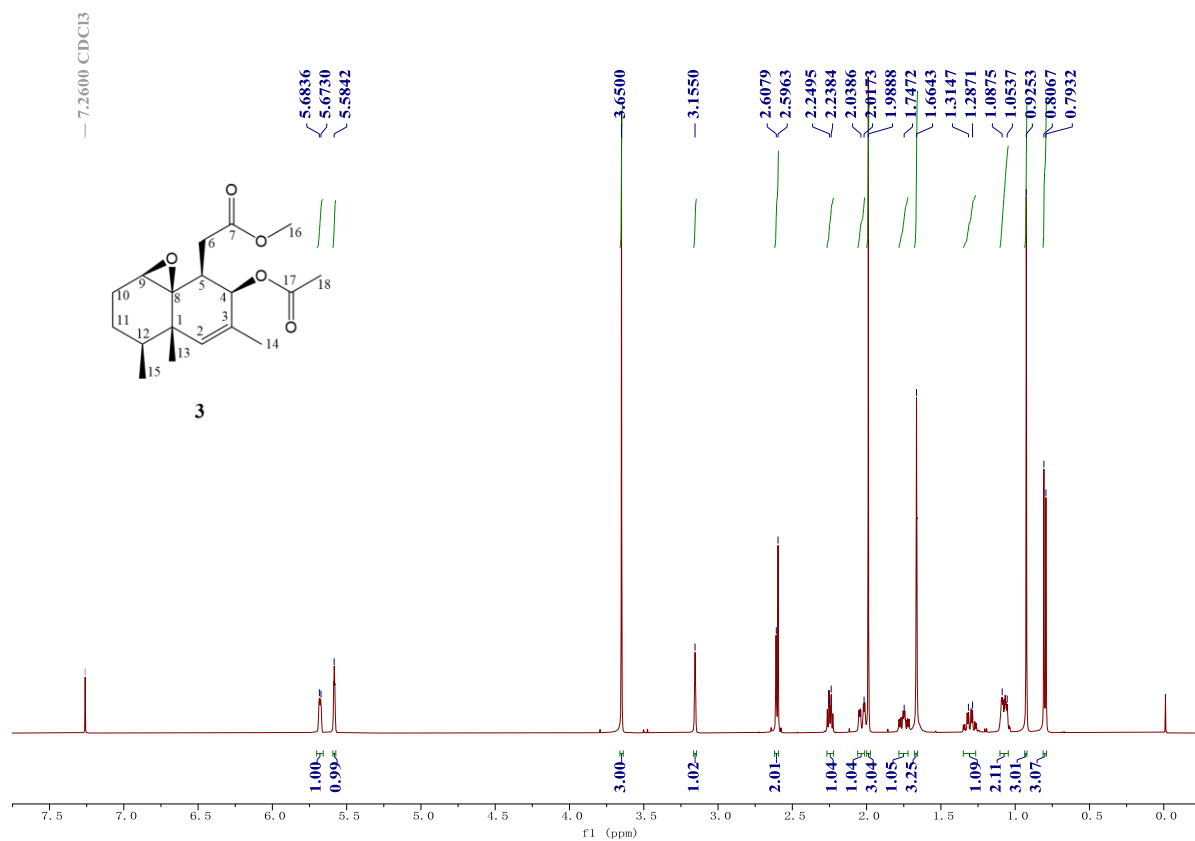

**Figure S23.** <sup>1</sup>H NMR spectrum of compound **3** in CDCl<sub>3</sub>, 500MHz.

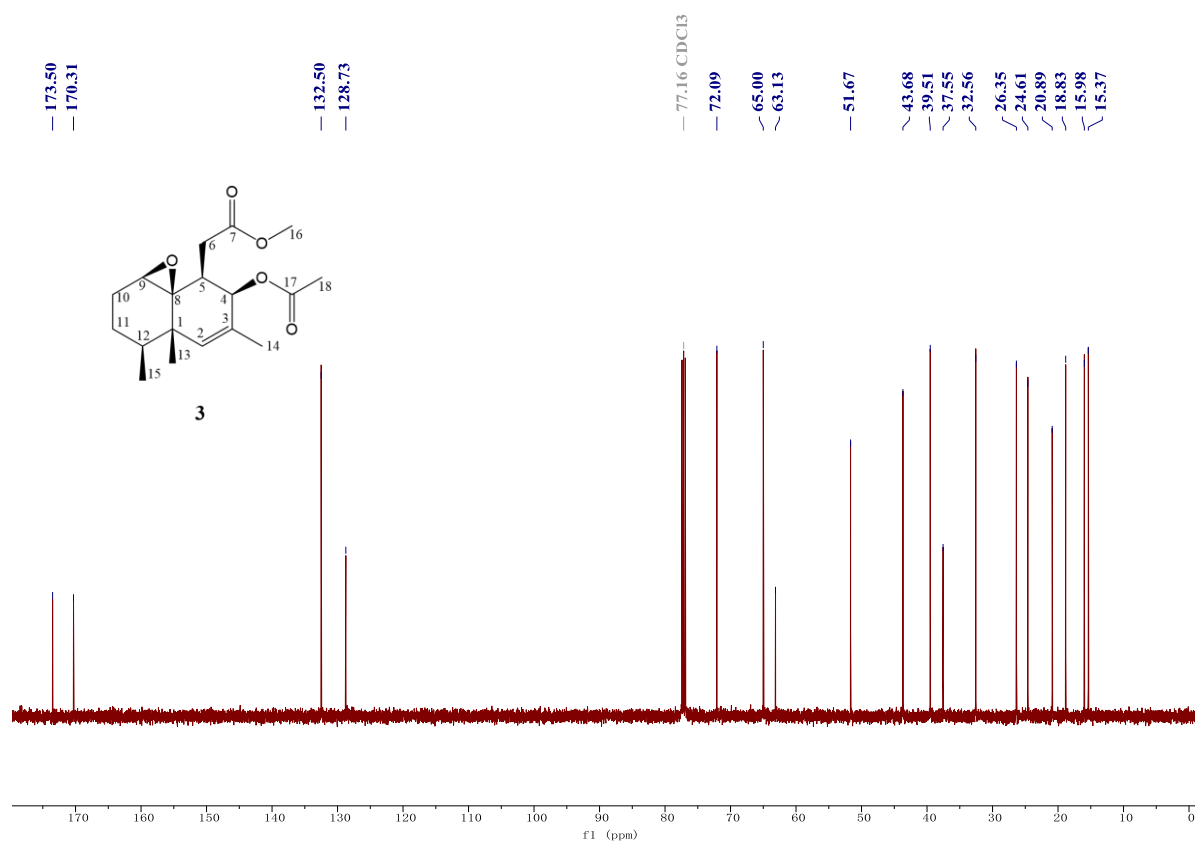

**Figure S24.** <sup>13</sup>C NMR spectrum of compound **3** in CDCl<sub>3</sub>, 125MHz.

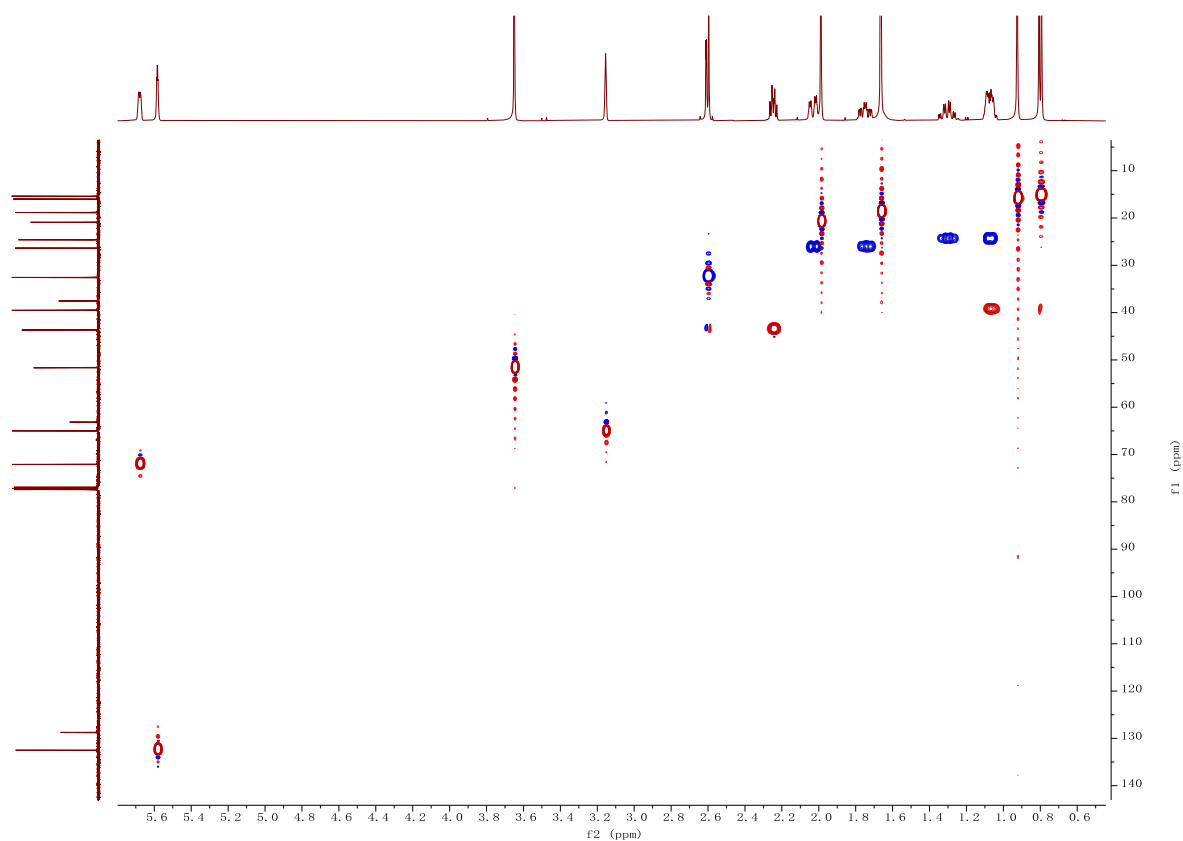

**Figure S25.** HSQC spectrum of compound **3** in CDCl<sub>3</sub>, 500MHz.

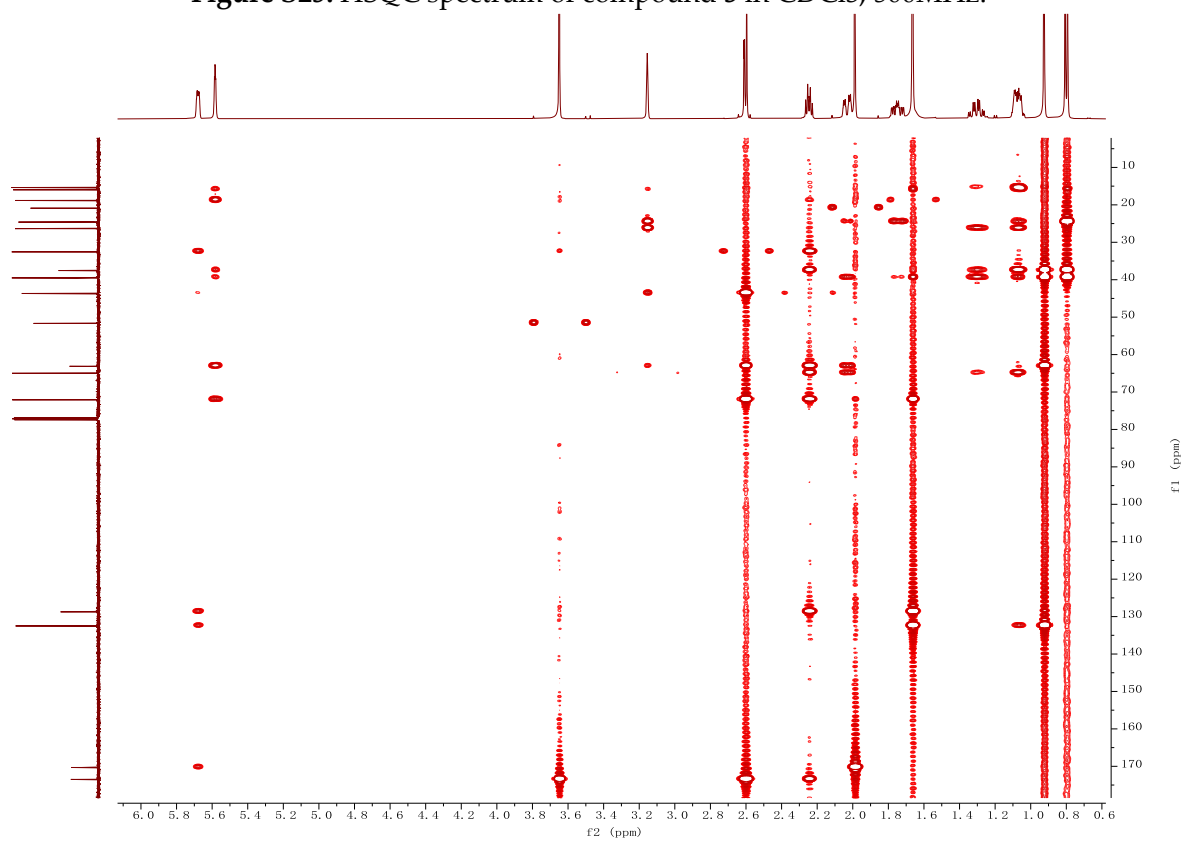

**Figure S26.** HMBC NMR spectrum of compound **3** in CDCl<sub>3</sub>, 500MHz.

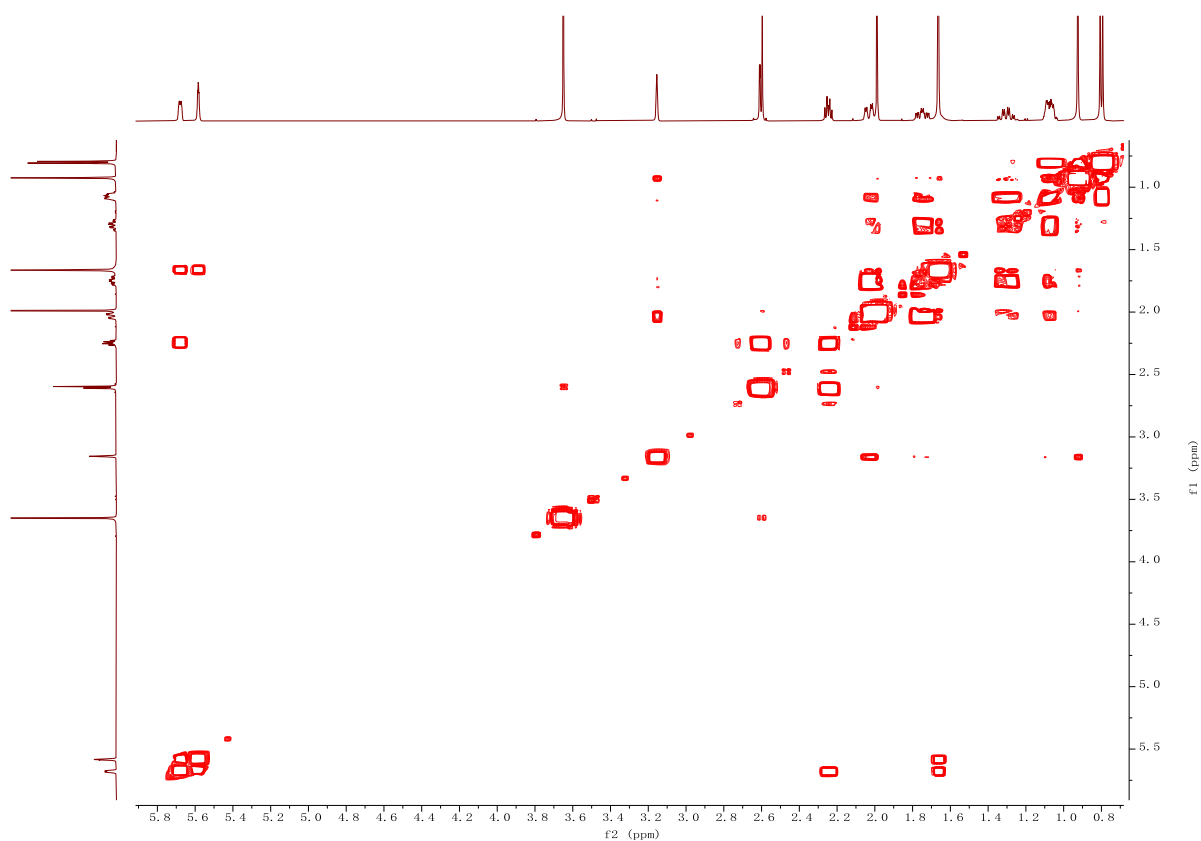

**Figure S27.**  $^1\text{H}$ - $^1\text{H}$  COSY NMR spectrum of compound **3** in  $\text{CDCl}_3$ , 500MHz.

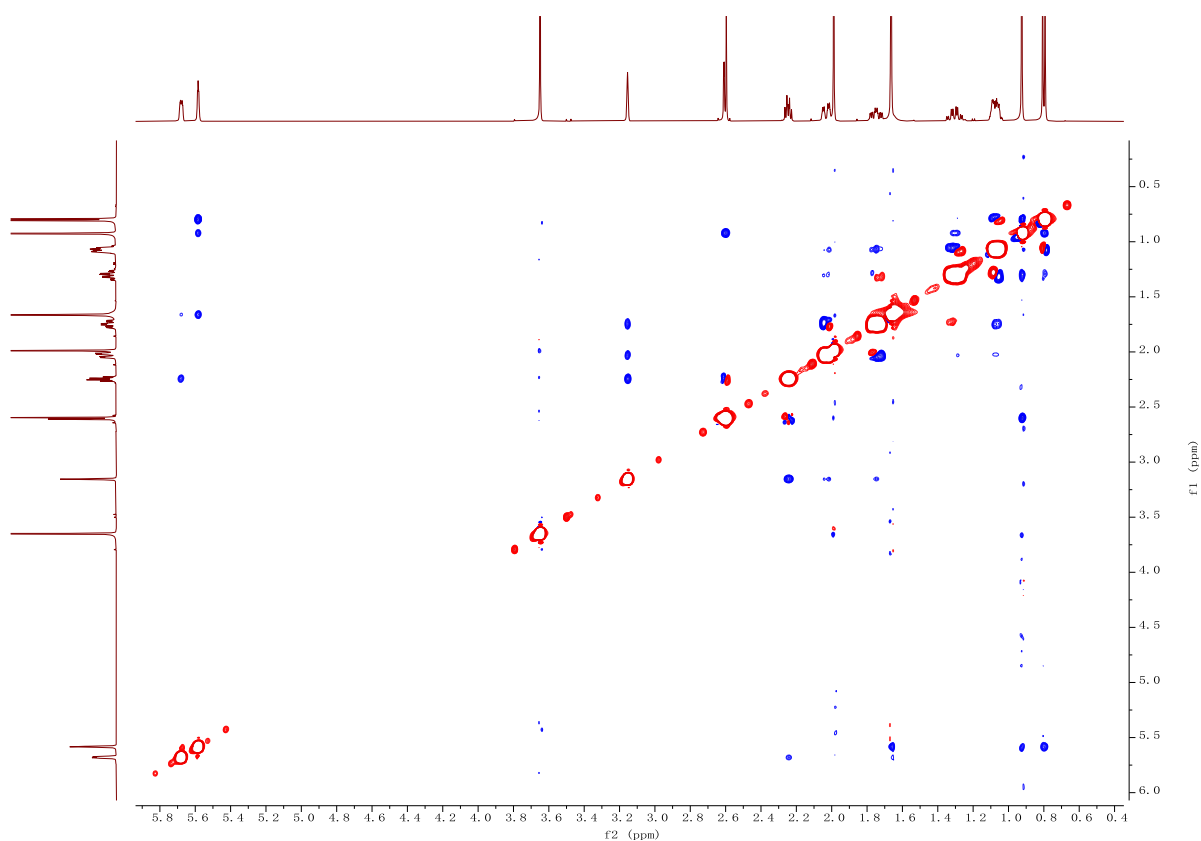

**Figure S28.** NOESY NMR spectrum of compound **3** in  $\text{CDCl}_3$ , 500MHz.

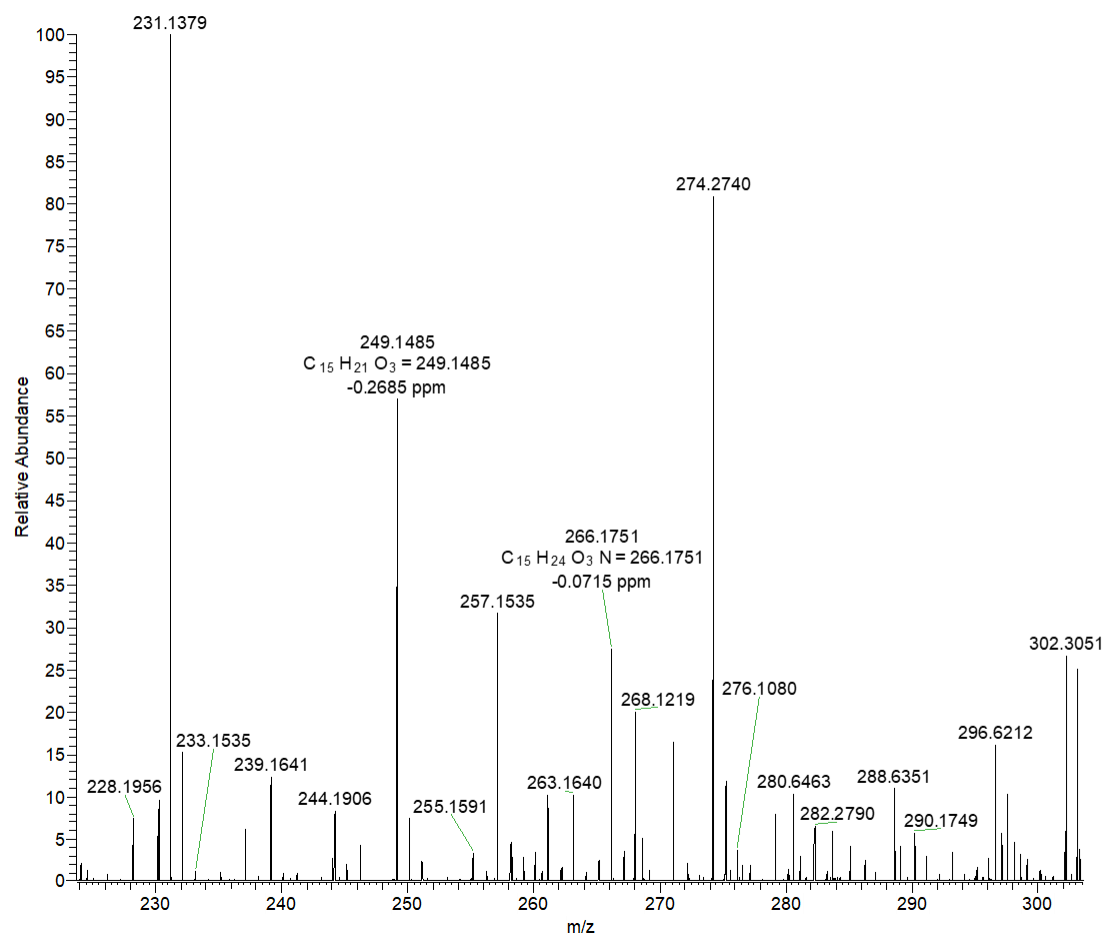

Figure S29. HRESIMS spectrum of compound 4.

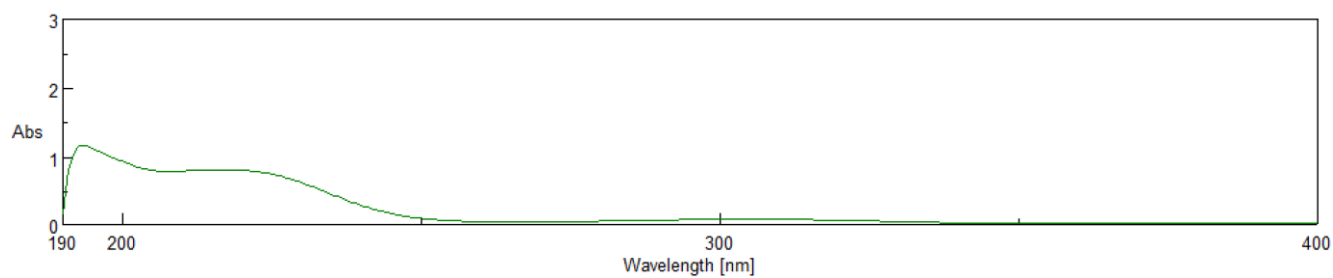

Figure S30. UV spectrum of compound 4.

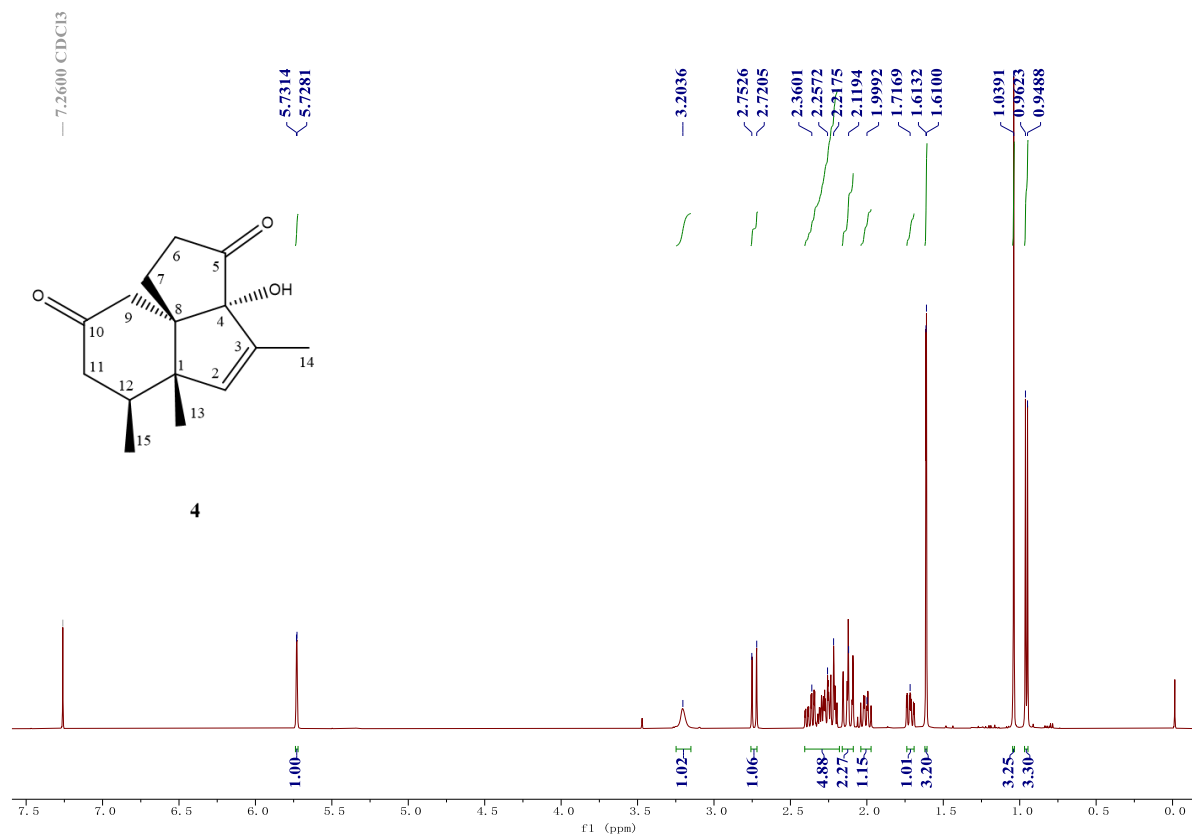

Figure S31.  $^1\text{H}$  NMR spectrum of compound 4 in  $\text{CDCl}_3$ , 500MHz.

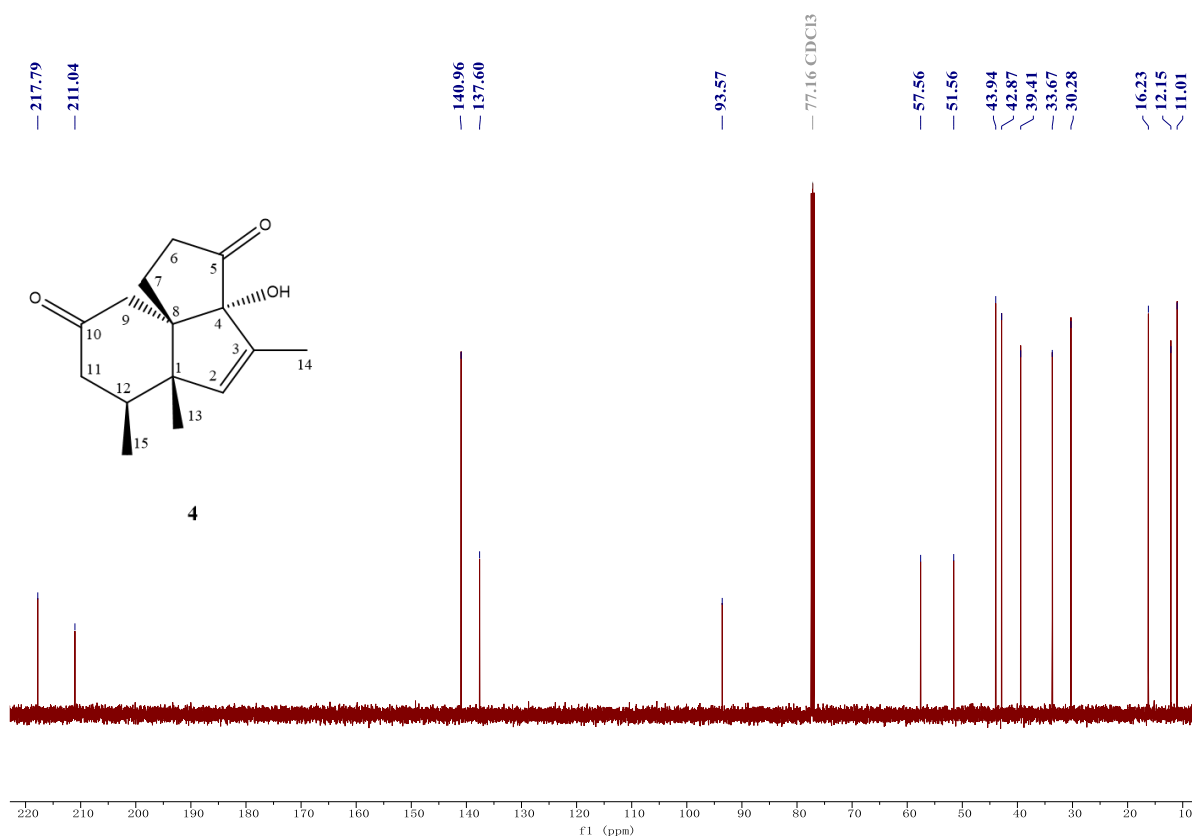

Figure S32.  $^{13}\text{C}$  NMR spectrum of compound 4 in  $\text{CDCl}_3$ , 125MHz.

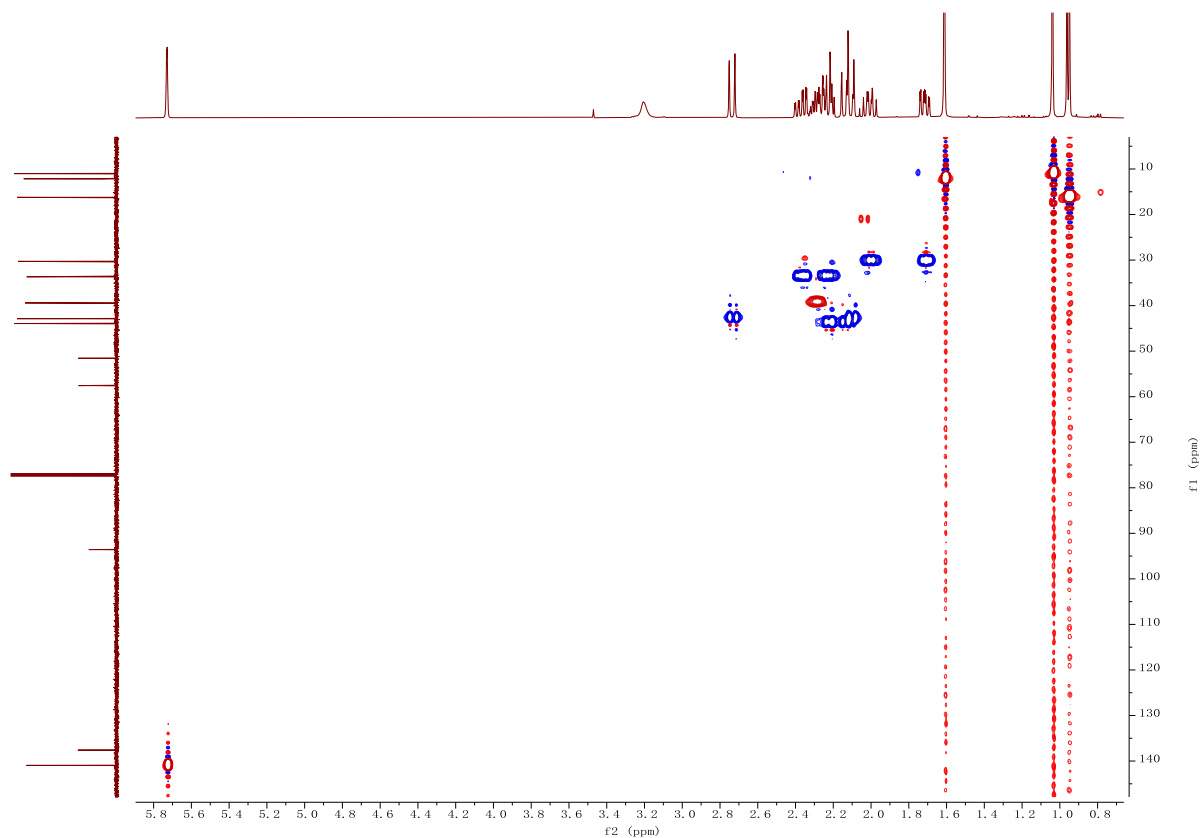

**Figure S33.** HSQC spectrum of compound **4** in CDCl<sub>3</sub>, 500MHz.

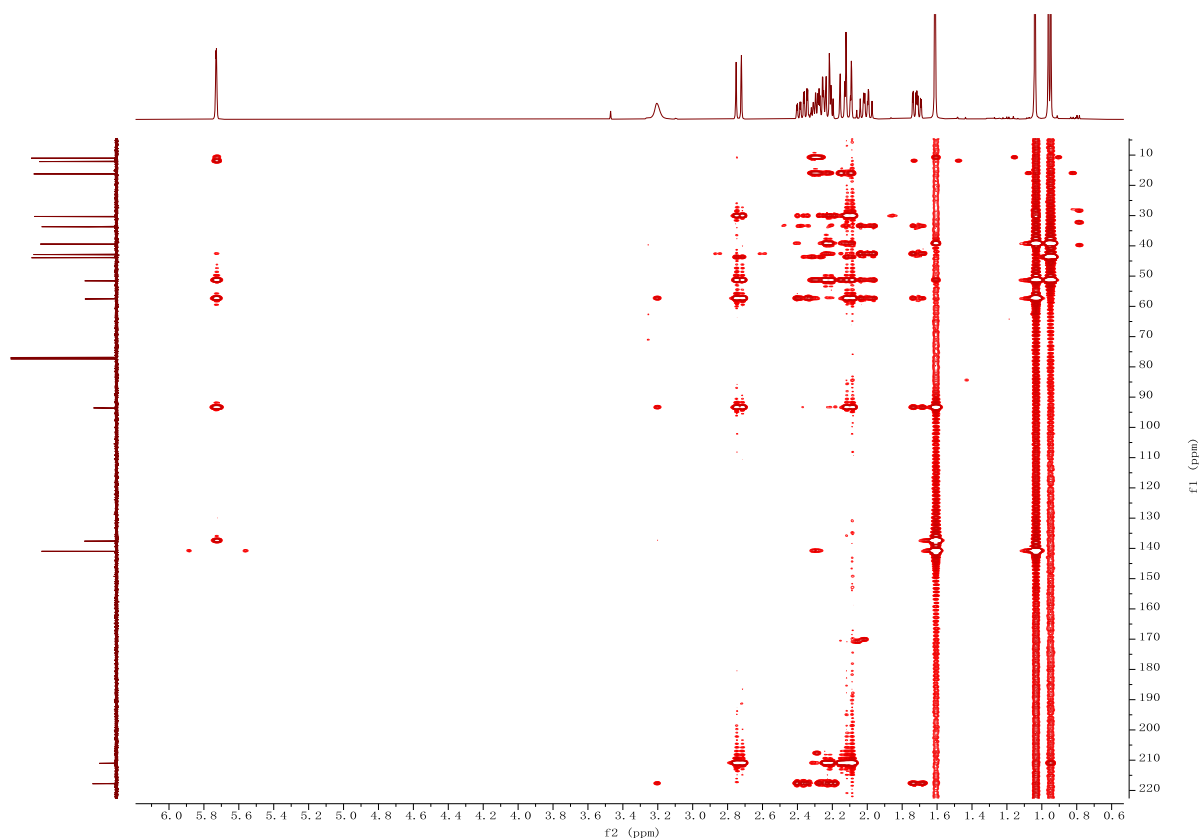

**Figure S34.** HMBC NMR spectrum of compound **4** in CDCl<sub>3</sub>, 500MHz.

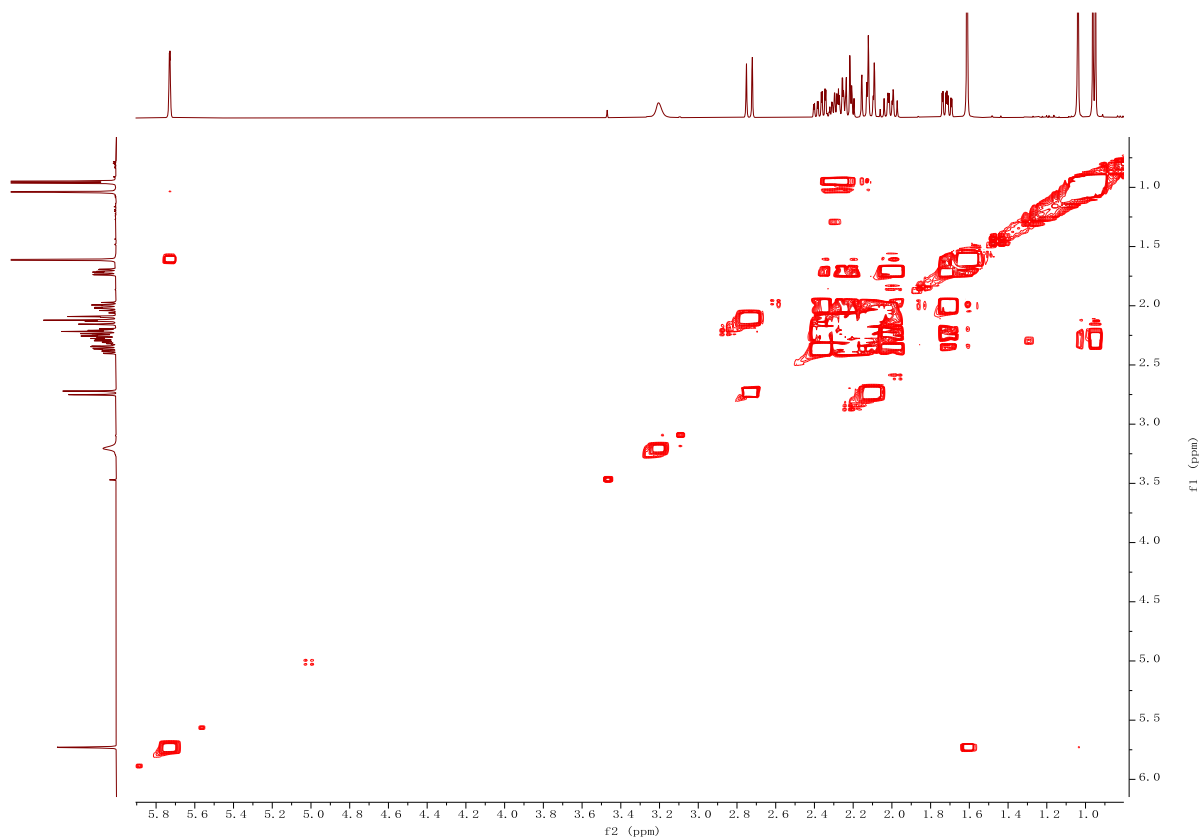

**Figure S35.**  $^1\text{H}$ - $^1\text{H}$  COSY NMR spectrum of compound **4** in  $\text{CDCl}_3$ , 500MHz.

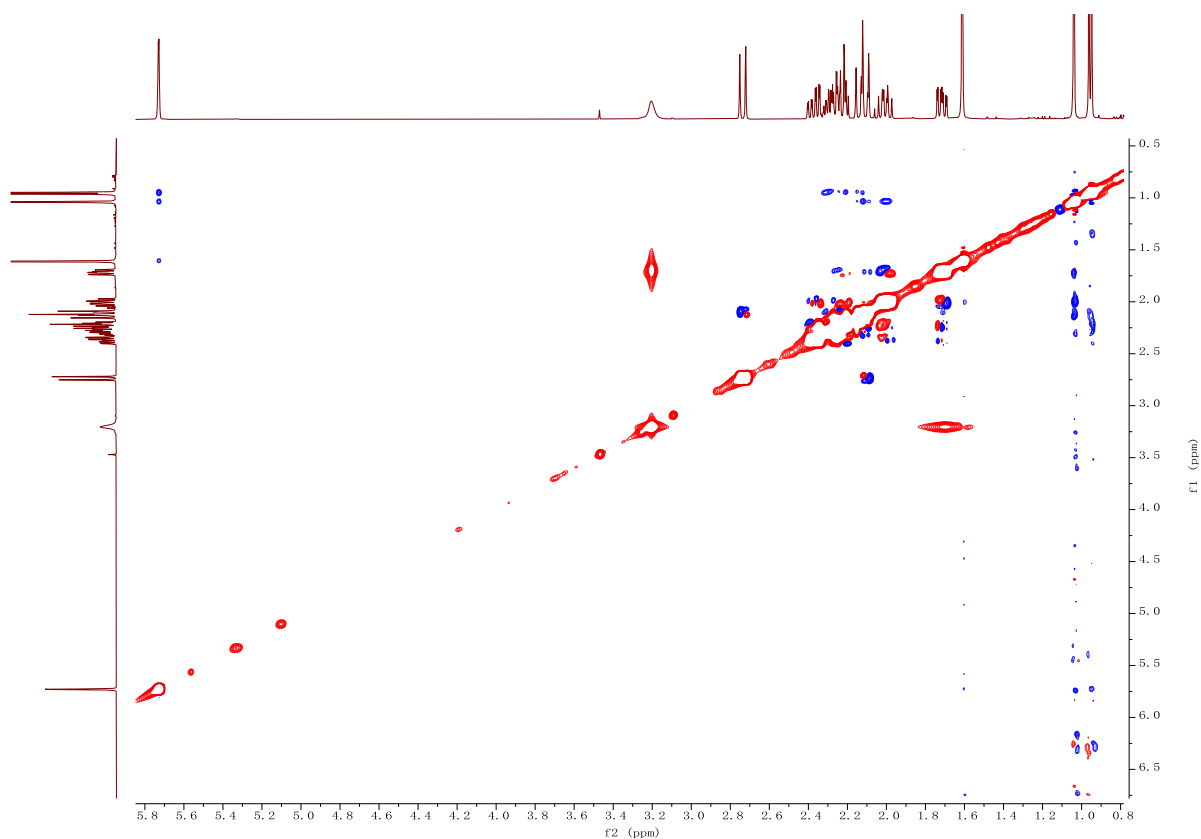

**Figure S36.** NOESY NMR spectrum of compound **4** in  $\text{CDCl}_3$ , 500MHz.



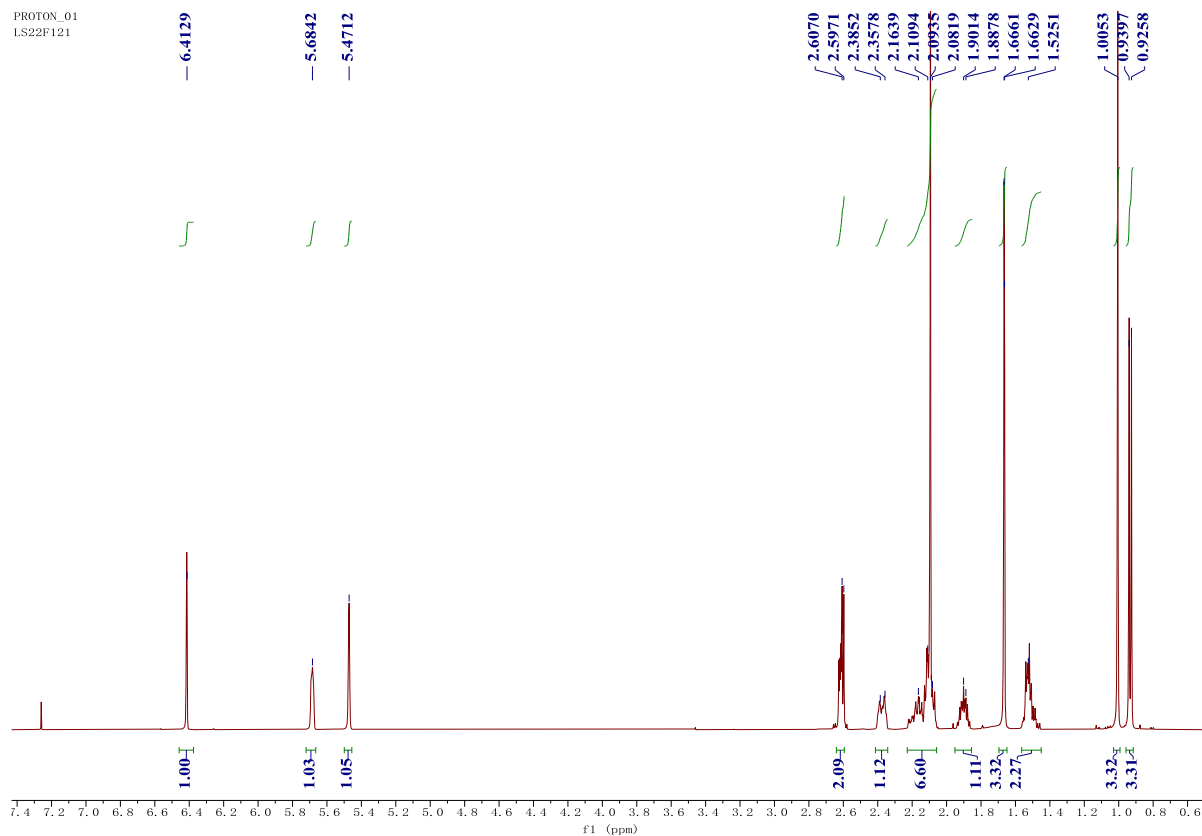

**Figure S37.**  $^1\text{H}$  NMR spectrum of compound **5** in  $\text{CDCl}_3$ , 500MHz.

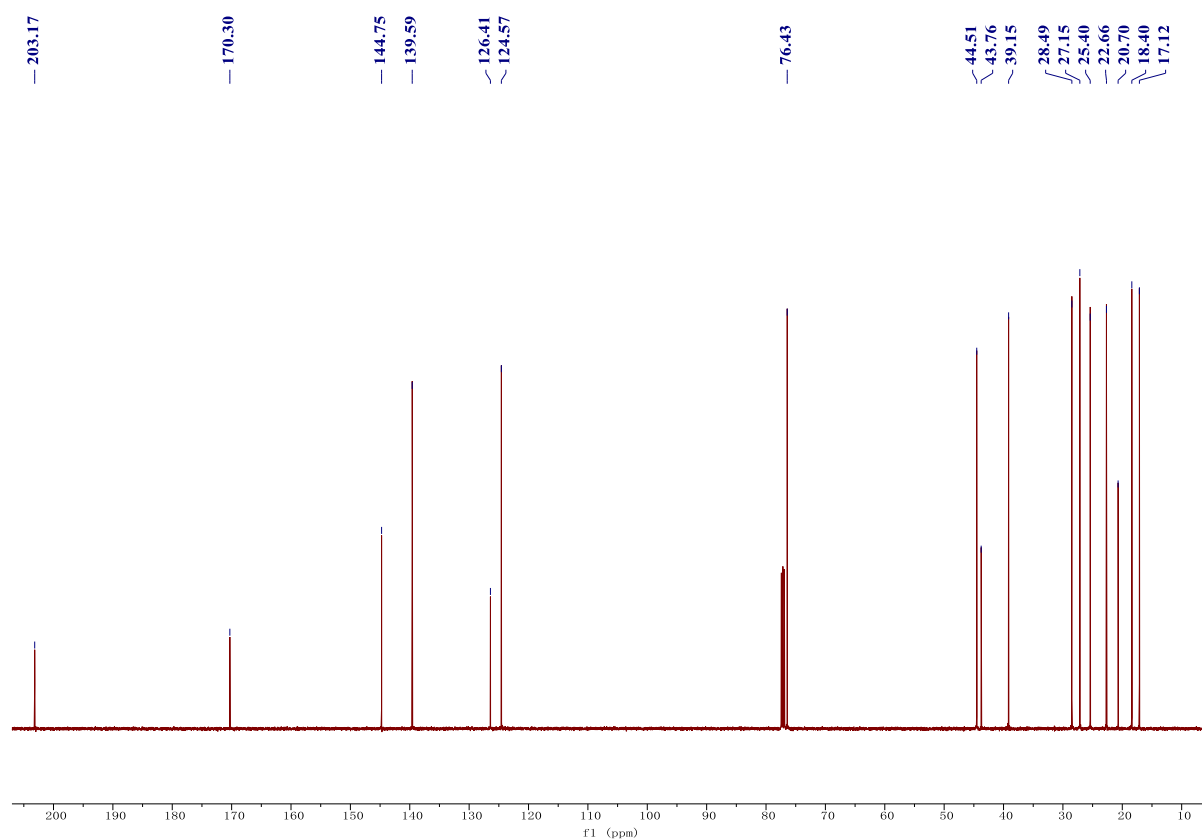

**Figure S38.**  $^{13}\text{C}$  NMR spectrum of compound **5** in  $\text{CDCl}_3$ , 125MHz.

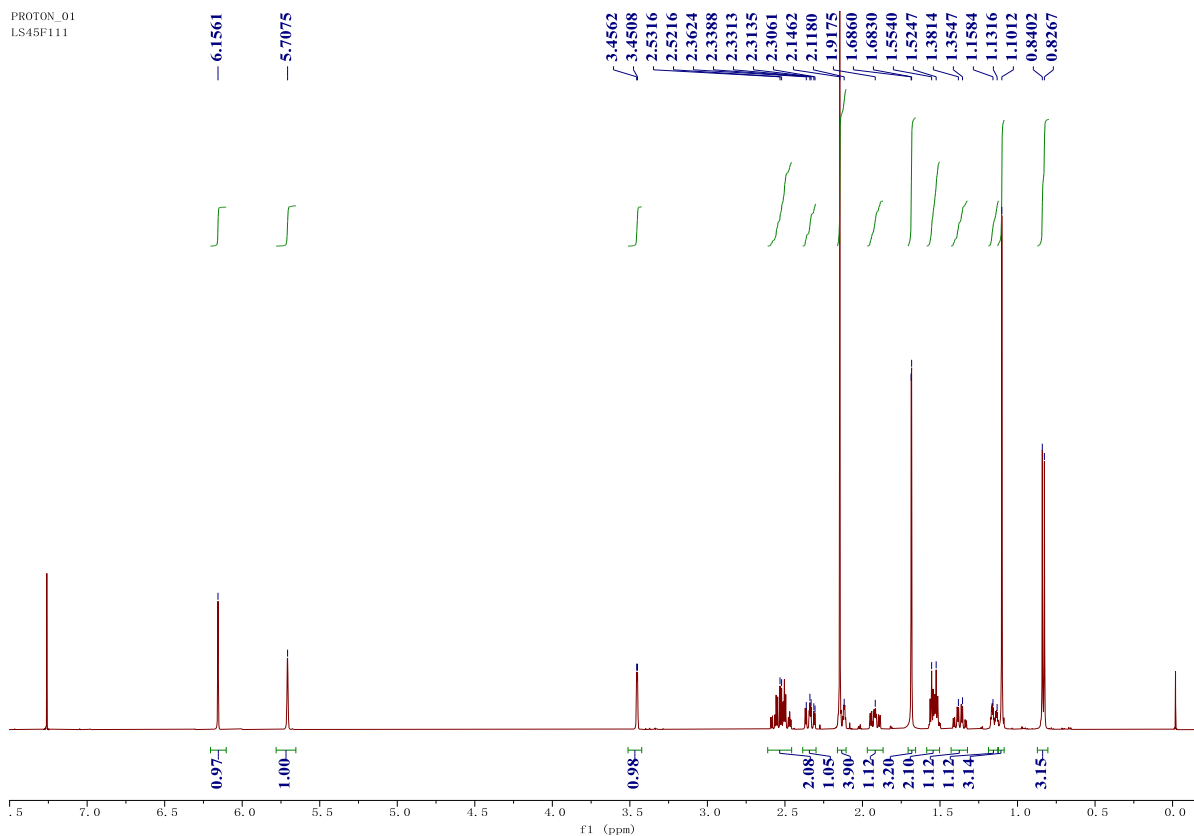

**Figure S39.**  $^1\text{H}$  NMR spectrum of compound **6** in  $\text{CDCl}_3$ , 500MHz.

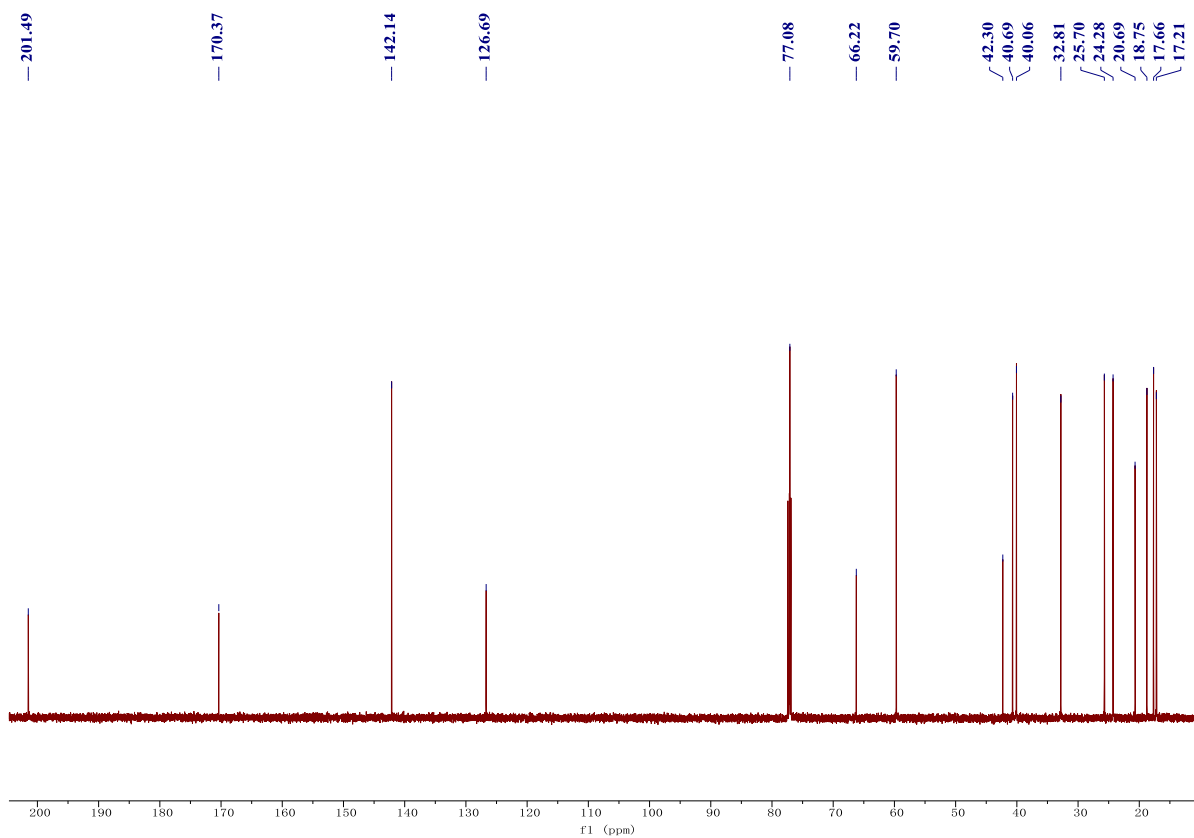

**Figure S40.**  $^{13}\text{C}$  NMR spectrum of compound **6** in  $\text{CDCl}_3$ , 125MHz.

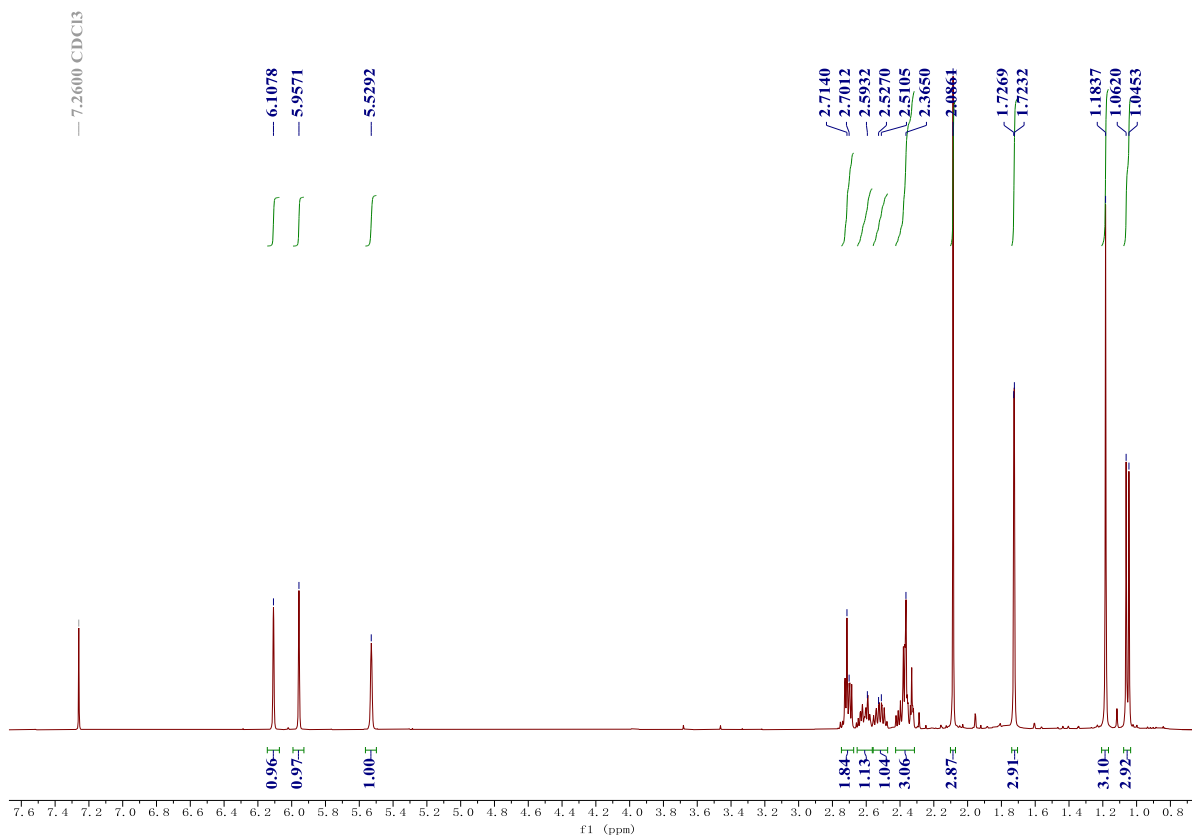

**Figure S41.** <sup>1</sup>H NMR spectrum of compound **7** in CDCl<sub>3</sub>, 400MHz.

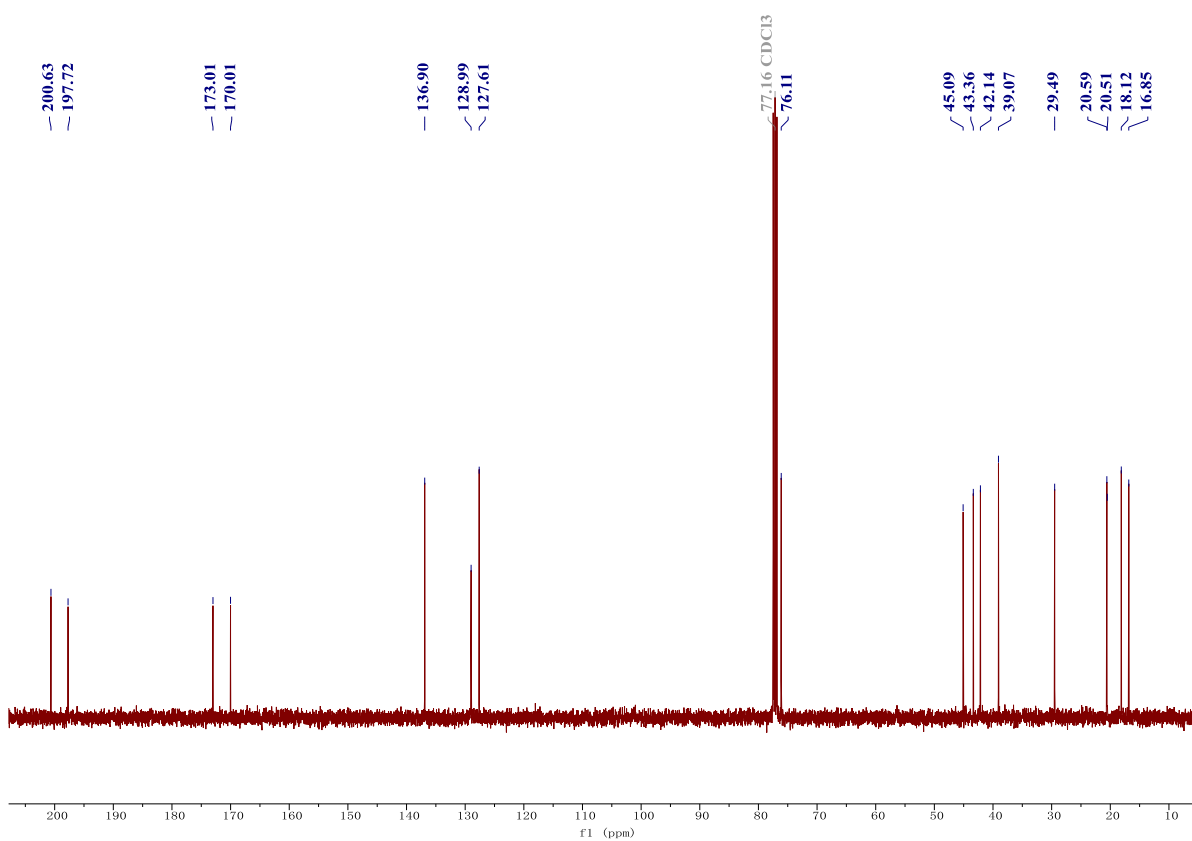

**Figure S42.** <sup>13</sup>C NMR spectrum of compound **7** in CDCl<sub>3</sub>, 100MHz.
